# Supplementary material for: Formation of C5H6 isomers: a combination of experimental and computational investigation
Source: Royal Society of Chemistry journal article supplement (doi:10.1039/d4cp03728f), 2025-01-01
Supplement: d4cp03728f1.pdf [file d4cp03728f1.pdf]

Supplemental Information to the paper

**Formation of C<sub>5</sub>H<sub>6</sub> isomers: A combination of experimental  
and computational investigation**

Yi-Fan Zhang <sup>a</sup>, Wang Li <sup>a\*</sup>, Chang-Yang Wang <sup>a</sup>, Chen Huang <sup>a</sup>, Hui-Ting Bian <sup>b\*</sup>, Long Zhao <sup>c,d\*</sup>

<sup>a</sup> *National Synchrotron Radiation Laboratory, University of Science and Technology of China,  
Hefei, Anhui 230029, China*

<sup>b</sup> *Technical Support Center for Prevention and Control of Disastrous Accidents in Metal Smelting,  
University of Science and Technology Beijing, Beijing, 100083, China*

<sup>c</sup> *School of Nuclear Science and Technology, University of Science and Technology of China,  
Hefei, Anhui 230027, China*

<sup>d</sup> *Deep Space Exploration Laboratory, University of Science and Technology of China, Hefei, Anhui  
230026, China*

---

\* Corresponding authors:

Long Zhao [zhaolong@ustc.edu.cn](mailto:zhaolong@ustc.edu.cn); Hui-ting Bian [bianht@ustb.edu.cn](mailto:bianht@ustb.edu.cn); Wang Li [liwang1020@ustc.edu.cn](mailto:liwang1020@ustc.edu.cn)

In this supporting information, we present:

- 1) Figure S1. Schematic diagram of SiC reactor.
- 2) Figure S2. Comparison of matches for experimental PIE of  $m/z = 66$  in  $C_3H_3Br/C_2H_4$  system using different isomers.
- 3) Figure S3. Experimental PIE for  $m/z = 39, 54, 76$  and  $78$  in  $C_3H_3Br/C_2H_4$  system.
- 4) Figure S4. Experimental PIE of  $m/z = 66$  in  $C_3H_3Br/C_2H_4$  system using 0 K Franck-Condon simulation result in 1,2,4-pentatriene and 3-methylidenecyclobut-1-ene.
- 5) Figure S5. Computed FCFs of 1,2,4-pentatriene and 3-methylidenecyclobut-1-ene at 0 K.
- 6) Figure S6. Computed FCFs of 1,2,4-pentatriene and 3-methylidenecyclobut-1-ene at 1000 K.
- 7) Figure S7. Rate constants for the reaction of propargyl + ethylene  $\rightarrow$  products within 300-1600 K at pressures of 760, 7600, and 76000 Torr.
- 8) Table S1. Summary of calculated ionization energies for structures with  $m/z = 65$ .
- 9) Table S2. Cartesian coordinates and frequencies of optimized structures at M062X/6-311++G(d,p) level for all species in this work.

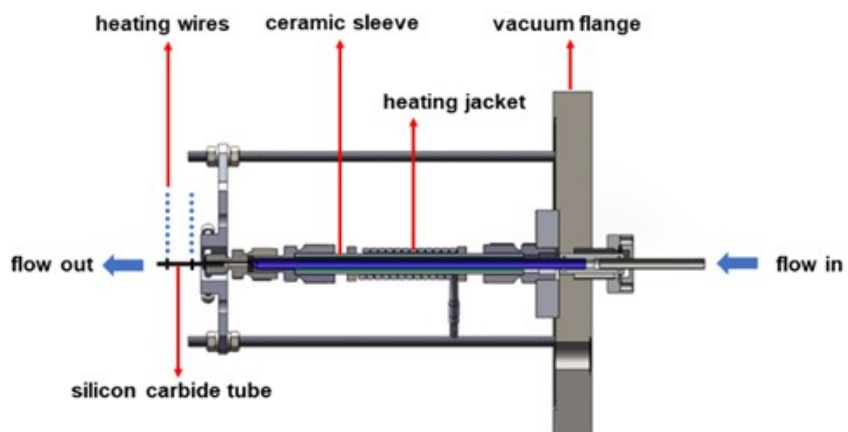

**Figure S1.** Schematic diagram of silicon carbide micro reactor.

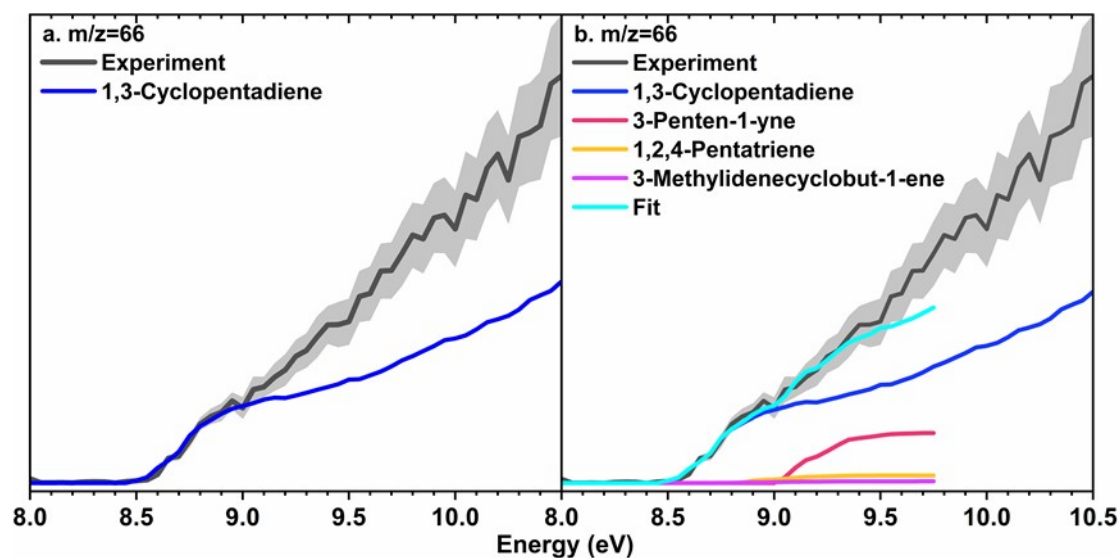

**Figure S2.** Comparison of matches for experimental PIE of  $m/z = 66$  in propargyl bromide ( $C_3H_3Br$ )/ethylene ( $C_2H_4$ ) system using referred /calculated Franck-Condon factor simulation of (a) 1,3-cyclopentadiene with  $C_5H_5$  isotope, (b) 1,3-cyclopentadiene, 3-penten-1-yne, 1,2,4-pentatriene, 3-methylidenecyclobut-1-ene and  $C_5H_5$  isotope. The colored lines refer to reference /calculated PIE curves and the cyan line shows the overall fit via the linear combination of reference curves. The black lines refer to the experimental data and the overall error bars consist of two parts:  $\pm 10\%$  based on the accuracy of photodiode and a  $1\sigma$  error of PIE curve averaged over the individual scans.

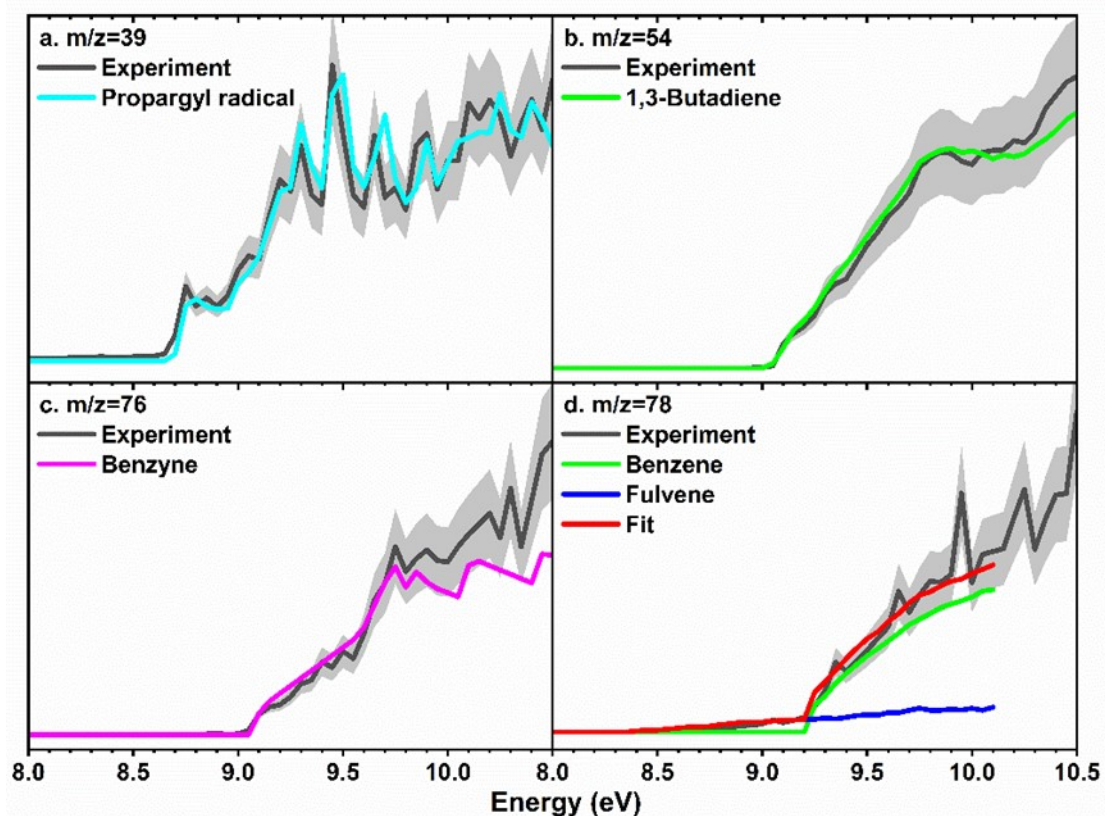

**Figure S3.** Experimental photoionization efficiency curves (PIE, black lines) for  $m/z = 39, 54, 76$  and  $78$  in propargyl bromide ( $C_3H_3Br$ )/ethylene ( $C_2H_4$ ) system, with  $1\sigma$  error limits defined in the shaded area. The colored lines refer to the reference PIE curves and the red lines show the overall fit via the linear combination of the reference curves.

Figure S3 shows PIE curves of  $m/z = 39, 54, 76$  and  $78$  in propargyl bromide ( $C_3H_3Br$ )/ethylene ( $C_2H_4$ ) system. Propargyl ( $C_3H_3$ ) can be determined according to the experimental and referred PIE curves (Fig. S3a) and it is generated from Br-losing atom from  $C_3H_3Br$  molecule. Propargyl can also undergo recombination and isomerization, forming fulvene and benzene at  $m/z = 78$  as shown in Fig. S3d. Species at  $m/z = 78$  could also have H-elimination under the high experimental temperature, which produces a signal at  $m/z = 76$ . Figure S3b shows the PIE curve of  $m/z = 54$  and 1,3-butadiene can be identified. In the high temperature, the side-product of 1,3-butadiene can be generated through the  $C_2H_4$  recombination and H-loss reactions<sup>1</sup>.

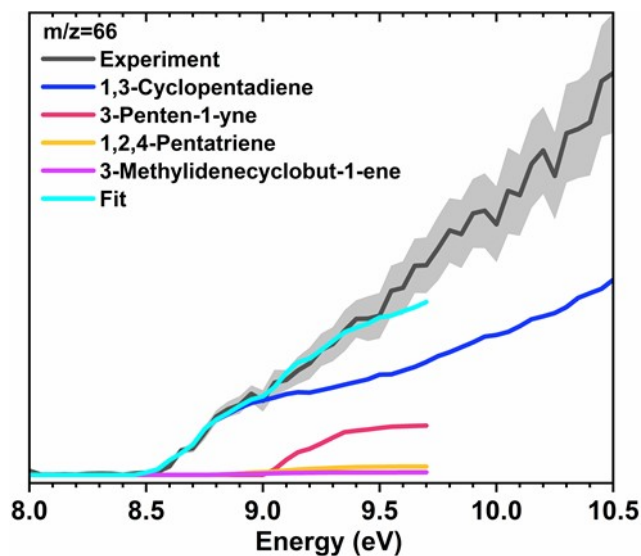

**Figure S4.** Experimental PIE of  $m/z = 66$  in propargyl bromide ( $C_3H_3Br$ )/ethylene ( $C_2H_4$ ) system with 0 K Franck-Condon simulation result including 1,2,4-pentatriene and 3-methylidenecyclobut-1-ene. The colored lines refer to reference /calculated PIE curves and the cyan line shows the overall fit via the linear combination of reference curves. The black lines refer to the experimental data and the overall error bars consist of two parts:  $\pm 10\%$  based on the accuracy of photodiode and a  $1\sigma$  error of PIE curve averaged over the individual scans.

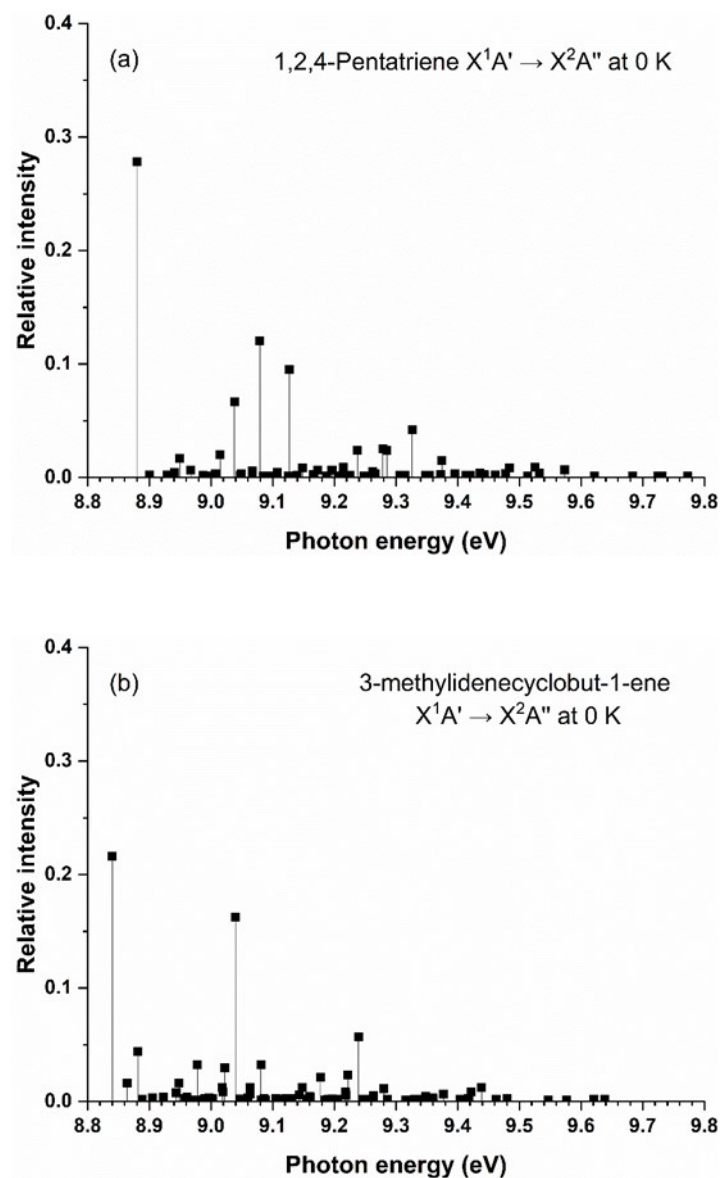

**Figure S5.** The computed FCFs of (a) 1,2,4-pentatriene and (b) 3-methylidenecyclobut-1-ene ionization to  $X^2A''$  states at 0 K.

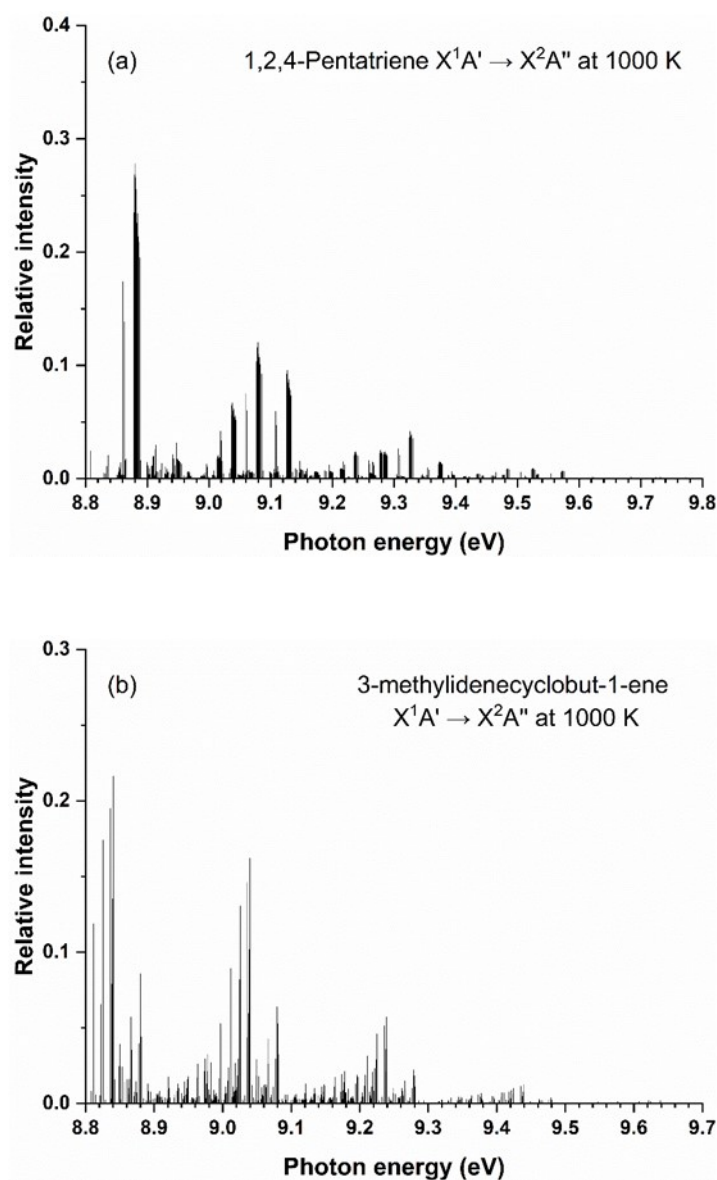

**Figure S6.** The computed FCFs of (a) 1,2,4-pentatriene and (b) 3-methylenecyclobut-1-ene ionization to  $X^2A''$  states at 1000 K.



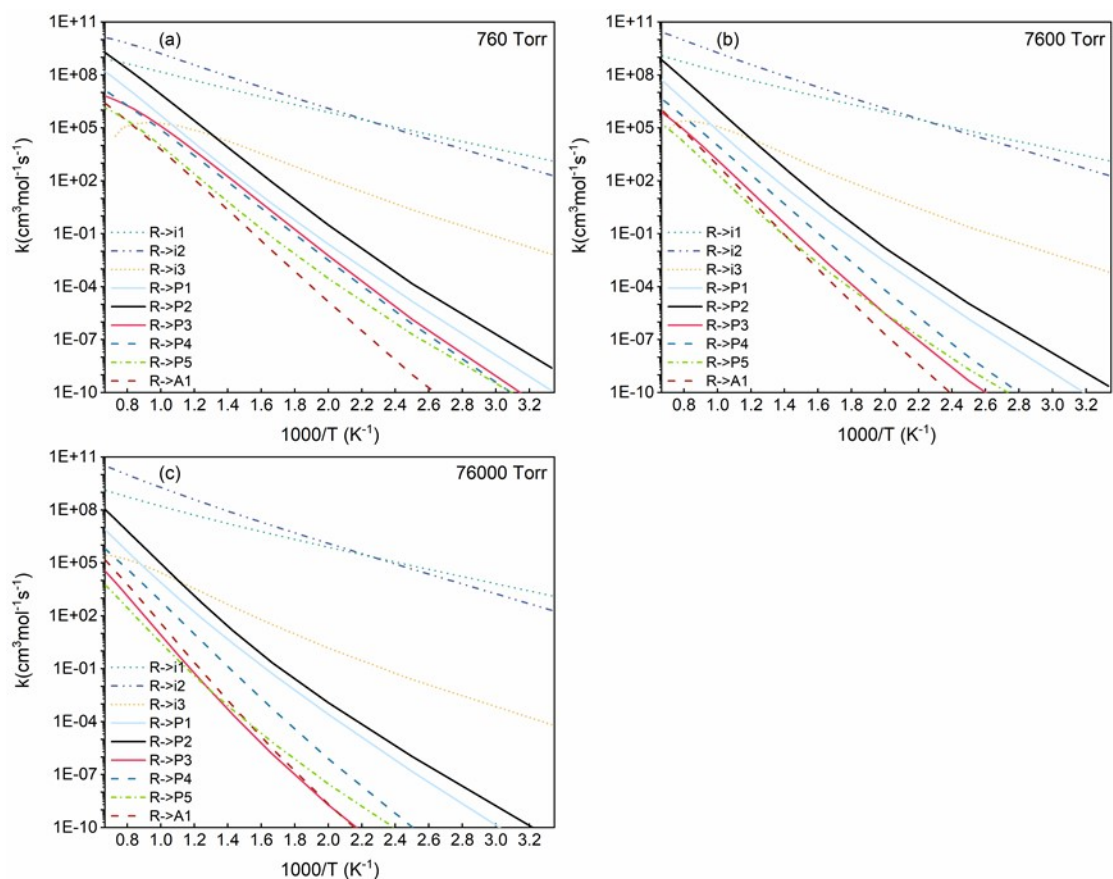

**Figure S7.** Rate constants for the reactions of propargyl ( $\text{C}_3\text{H}_3$ ) + ethylene ( $\text{C}_2\text{H}_4$ )  $\rightarrow$  products (P1: 4-penten-1-yne + H, P2: 1,2,4-pentatriene + H, P3: 1,3-cyclopentadiene + H, P4: 3-penten-1-yne + H, P5: 3-methylidenecyclobut-1-ene + H and A1: 1,2,3-butatriene + methyl) within 300-1600 K at pressures of (a) 760 Torr, (b) 7600 Torr, and (c) 76000 Torr.

**Table S1:** Summary of calculated ionization energy results for structures with  $m/z = 65$ .

| Structure                         | Structure diagram                                                                  | Ionization energy (eV) | Calculation method |
|-----------------------------------|------------------------------------------------------------------------------------|------------------------|--------------------|
| cis-pent-1-en-4-yn-3-yl radical   | 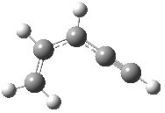  | 7.98                   | CBS-QB3            |
| trans-pent-1-en-4-yn-3-yl radical |   | 7.91                   |                    |
| 3-methylenecyclobut-1-ene radical |   | 7.71                   |                    |
| 1,2,4-pentatriene radical         |  | 7.86                   |                    |

The ionization energies of these four  $\cdot\text{C}_5\text{H}_5$  isomers were calculated, and the results are provided in the table. The results show that the ionization energies of the four possible linear isomers at  $m/z = 65$  are all below 8.0 eV. As clearly shown in Fig. 4a, the PIE curve begins to rise at  $8.40 \pm 0.05$  eV, which aligns well with the ionization energy of cyclopentadienyl at 8.41 eV. This indicates that the four linear isomers have no or negligible contribution to experimental ions collected at  $m/z = 65$ .

**Table S2:** Cartesian coordinates and frequencies ( $\text{cm}^{-1}$ ) of reactants, intermediates, transition states, and products.

| $\text{C}_3\text{H}_3$           |           |           |           |   |
|----------------------------------|-----------|-----------|-----------|---|
| Atom                             | X         | Y         | Z         | Å |
| C                                | 1.337175  | 0.000171  | -0.00002  |   |
| C                                | 0.120443  | -0.000112 | 0.000064  |   |
| H                                | 2.400845  | -0.000501 | -0.000096 |   |
| C                                | -1.256052 | 0.000006  | 0.000015  |   |
| H                                | -1.805202 | -0.931069 | -0.000128 |   |
| H                                | -1.805045 | 0.931175  | -0.000128 |   |
| Frequencies ( $\text{cm}^{-1}$ ) |           |           |           |   |
| 359.3012                         | 411.3266  | 577.8062  | 669.5679  |   |
| 696.8377                         | 1033.6678 | 1069.7291 | 1457.5041 |   |
| 2028.2515                        | 3184.838  | 3286.2399 | 3485.5889 |   |

| $\text{C}_2\text{H}_4$           |           |           |           |   |
|----------------------------------|-----------|-----------|-----------|---|
| Atom                             | X         | Y         | Z         | Å |
| C                                | 0         | 0         | -0.66289  |   |
| H                                | 0         | -0.923572 | -1.230818 |   |
| H                                | 0         | 0.923572  | -1.230818 |   |
| C                                | 0         | 0         | 0.66289   |   |
| H                                | 0         | 0.923572  | 1.230818  |   |
| H                                | 0         | -0.923572 | 1.230818  |   |
| Frequencies ( $\text{cm}^{-1}$ ) |           |           |           |   |
| 829.9146                         | 986.9828  | 998.7481  | 1063.6198 |   |
| 1238.705                         | 1385.3261 | 1470.2164 | 1712.1449 |   |
| 3159.2687                        | 3175.6359 | 3238.6169 | 3264.2018 |   |

| il                               |           |           |           |   |
|----------------------------------|-----------|-----------|-----------|---|
| Atom                             | X         | Y         | Z         | Å |
| C                                | -0.014644 | 0.971727  | -0.272787 |   |
| C                                | 1.238953  | 0.353222  | 0.374043  |   |
| C                                | -1.208367 | 0.152657  | -0.062708 |   |
| C                                | 1.582762  | -0.979430 | -0.191731 |   |
| H                                | 1.059955  | 0.277972  | 1.456892  |   |
| H                                | 2.075944  | 1.046416  | 0.249967  |   |
| H                                | -0.192374 | 1.968010  | 0.140289  |   |
| H                                | 0.149959  | 1.090258  | -1.347621 |   |
| C                                | -2.173861 | -0.535814 | 0.125223  |   |
| H                                | 0.794202  | -1.666387 | -0.470860 |   |
| H                                | 2.597254  | -1.350578 | -0.149730 |   |
| H                                | -3.034000 | -1.139866 | 0.288821  |   |
| Frequencies ( $\text{cm}^{-1}$ ) |           |           |           |   |
| 122.2483                         | 144.6466  | 197.2104  | 356.3808  |   |
| 364.4951                         | 474.2708  | 555.7449  | 713.677   |   |
| 718.3343                         | 764.3573  | 875.8599  | 944.991   |   |
| 1003.6356                        | 1074.9502 | 1122.2117 | 1188.0684 |   |
| 1278.3034                        | 1346.8449 | 1371.2887 | 1465.6872 |   |

1474.5212 1477.6776 2251.9414 2999.9791  
 3067.682 3086.9098 3109.9069 3173.7078  
 3281.1567 3495.3548

| i2                 |           |           |           |   |
|--------------------|-----------|-----------|-----------|---|
| Atom               | X         | Y         | Z         | Å |
| C                  | 0.022148  | 0.971727  | -0.272787 |   |
| C                  | 1.425344  | 0.353222  | 0.374043  |   |
| C                  | -1.072090 | 0.152657  | -0.062708 |   |
| C                  | 1.505891  | -0.979430 | -0.191731 |   |
| H                  | 1.943803  | 0.277972  | 1.456892  |   |
| H                  | 1.970560  | 1.046416  | 0.249967  |   |
| H                  | -0.070333 | 1.968010  | 0.140289  |   |
| C                  | -2.166126 | 1.090258  | -1.347621 |   |
| H                  | 2.426679  | -0.535814 | 0.125223  |   |
| H                  | 0.711367  | -1.666387 | -0.470860 |   |
| H                  | -2.641117 | -1.350578 | -0.149730 |   |
| H                  | -2.631963 | -1.139866 | 0.288821  |   |
| Frequencies (cm-1) |           |           |           |   |
| 63.8257            | 89.3001   | 197.2104  | 356.3808  |   |
| 349.9124           | 466.2696  | 555.7449  | 713.677   |   |
| 780.4137           | 894.0638  | 875.8599  | 944.991   |   |
| 1020.31            | 1036.419  | 1122.2117 | 1188.0684 |   |
| 1210.366           | 1325.218  | 1371.2887 | 1465.6872 |   |
| 1466.499           | 1483.541  | 2251.9414 | 2999.9791 |   |
| 3072.72            | 3156.398  | 3109.9069 | 3173.7078 |   |
| 3238.326           | 3281.509  |           |           |   |

| i3                 |           |           |           |   |
|--------------------|-----------|-----------|-----------|---|
| Atom               | X         | Y         | Z         | Å |
| C                  | 1.248028  | -0.404391 | 0.106639  |   |
| C                  | 0.610620  | 0.991407  | -0.143599 |   |
| C                  | 0.048236  | -1.279031 | -0.067001 |   |
| C                  | -0.906507 | 0.820165  | 0.120778  |   |
| H                  | 0.759331  | 1.257446  | -1.191817 |   |
| H                  | 1.062298  | 1.772206  | 0.468943  |   |
| H                  | 2.057645  | -0.626613 | -0.589680 |   |
| H                  | 1.646375  | -0.501047 | 1.121589  |   |
| C                  | -1.123561 | -0.676909 | -0.061378 |   |
| H                  | -1.175532 | 1.112955  | 1.141395  |   |
| H                  | -1.513045 | 1.421159  | -0.560013 |   |
| H                  | -2.097969 | -1.143549 | -0.123051 |   |
| Frequencies (cm-1) |           |           |           |   |
| 161.7857           | 382.8148  | 602.5444  | 756.3731  |   |
| 771.3196           | 824.4859  | 894.1067  | 902.235   |   |
| 941.3828           | 987.2208  | 1033.713  | 1055.203  |   |
| 1143.523           | 1196.307  | 1220.713  | 1234.526  |   |
| 1303.059           | 1311.172  | 1339.914  | 1482.268  |   |
| 1489.602           | 1507.941  | 1696.354  | 3053.119  |   |
| 3065.104           | 3087.105  | 3107.937  | 3120.878  |   |

3143.376 3232.408

i4

| Atom | X         | Y         | Z         | Å |
|------|-----------|-----------|-----------|---|
| C    | 0.000063  | -0.272515 | -0.000190 |   |
| C    | 1.245542  | 0.396009  | -0.000061 |   |
| C    | -1.245649 | 0.395912  | -0.000036 |   |
| C    | 2.450225  | -0.229609 | 0.000089  |   |
| H    | 1.221042  | 1.483558  | 0.000071  |   |
| H    | 2.516974  | -1.311824 | -0.000055 |   |
| H    | 0.000308  | -1.359748 | 0.000011  |   |
| C    | -2.450204 | -0.229616 | 0.000100  |   |
| H    | 3.377391  | 0.327608  | 0.000333  |   |
| H    | -1.221123 | 1.483474  | -0.000018 |   |
| H    | -3.377342 | 0.327667  | 0.000154  |   |
| H    | -2.517115 | -1.311821 | 0.000089  |   |

Frequencies (cm-1)

|          |          |          |          |
|----------|----------|----------|----------|
| 152.821  | 205.038  | 251.069  | 456.570  |
| 493.026  | 594.492  | 632.402  | 841.883  |
| 891.614  | 901.488  | 922.420  | 992.323  |
| 1007.905 | 1033.834 | 1125.048 | 1253.365 |
| 1299.203 | 1302.072 | 1310.049 | 1440.251 |
| 1466.720 | 1530.651 | 1607.015 | 3161.848 |
| 3162.928 | 3170.667 | 3172.907 | 3174.861 |
| 3270.995 | 3271.101 |          |          |

i5

| Atom | X         | Y         | Z         | Å |
|------|-----------|-----------|-----------|---|
| C    | -0.042884 | -0.485254 | -0.000022 |   |
| C    | 1.018126  | 0.423336  | -0.000132 |   |
| C    | -1.347420 | -0.155467 | -0.000135 |   |
| C    | 2.450533  | 0.007519  | 0.000085  |   |
| H    | 0.787910  | 1.483058  | -0.000220 |   |
| H    | 2.978759  | 0.394815  | -0.877724 |   |
| H    | 0.192787  | -1.548499 | -0.000019 |   |
| C    | -2.606338 | 0.166501  | 0.000108  |   |
| H    | 2.547314  | -1.079694 | -0.000013 |   |
| H    | 2.978431  | 0.394574  | 0.878210  |   |
| H    | -3.158509 | 0.308091  | 0.927032  |   |
| H    | -3.158798 | 0.307844  | -0.926693 |   |

Frequencies (cm-1)

|          |          |          |          |
|----------|----------|----------|----------|
| 121.5724 | 138.2699 | 163.2057 | 269.2259 |
| 387.9138 | 512.9463 | 566.5188 | 717.5857 |
| 907.5422 | 912.6003 | 922.4477 | 984.8174 |
| 1018.621 | 1028.706 | 1130.357 | 1207.317 |
| 1300.307 | 1412.983 | 1431.424 | 1467.513 |
| 1478.031 | 1508.589 | 1925.283 | 3036.751 |
| 3082.195 | 3108.223 | 3133.093 | 3146.647 |
| 3178.326 | 3196.456 |          |          |

i6

| Atom               | X         | Y         | Z         | Å |
|--------------------|-----------|-----------|-----------|---|
| C                  | 0.000000  | -1.142621 | 0.489879  |   |
| C                  | -0.000013 | -0.776472 | -0.970236 |   |
| C                  | 0.000000  | 0.000000  | 1.272765  |   |
| C                  | 0.000013  | 0.776472  | -0.970236 |   |
| H                  | -0.875983 | -1.183685 | -1.485407 |   |
| H                  | 0.875941  | -1.183714 | -1.485421 |   |
| H                  | -0.000005 | -2.159346 | 0.856944  |   |
| H                  | 0.000000  | 0.000000  | 2.355461  |   |
| C                  | 0.000000  | 1.142621  | 0.489879  |   |
| H                  | 0.875983  | 1.183685  | -1.485407 |   |
| H                  | -0.875941 | 1.183714  | -1.485421 |   |
| H                  | 0.000005  | 2.159346  | 0.856944  |   |
| Frequencies (cm-1) |           |           |           |   |
| 84.9752            | 446.9125  | 607.0636  | 659.4385  |   |
| 726.8331           | 803.9419  | 815.8718  | 916.9569  |   |
| 925.0242           | 958.9825  | 991.7698  | 1044.663  |   |
| 1053.551           | 1112.36   | 1148.175  | 1227.584  |   |
| 1288.995           | 1297.005  | 1308.636  | 1383.688  |   |
| 1469.819           | 1490.851  | 1499.529  | 3045.43   |   |
| 3055.828           | 3066.608  | 3085.673  | 3221.729  |   |
| 3239.349           | 3252.093  |           |           |   |

i7

| Atom               | X         | Y         | Z         | Å |
|--------------------|-----------|-----------|-----------|---|
| C                  | 0.000001  | -0.368865 | 1.236214  |   |
| C                  | 0.000044  | -1.216578 | 0.000000  |   |
| C                  | 0.000001  | 1.031288  | 0.665245  |   |
| C                  | 0.000001  | -0.368865 | -1.236214 |   |
| H                  | -0.876225 | -0.547267 | 1.875667  |   |
| H                  | -0.000345 | -2.296686 | 0.000000  |   |
| H                  | 0.876217  | -0.547276 | 1.875698  |   |
| H                  | 0.000039  | 1.918078  | 1.287115  |   |
| C                  | 0.000001  | 1.031288  | -0.665245 |   |
| H                  | 0.876217  | -0.547276 | -1.875698 |   |
| H                  | -0.876225 | -0.547267 | -1.875667 |   |
| H                  | 0.000039  | 1.918078  | -1.287115 |   |
| Frequencies (cm-1) |           |           |           |   |
| 188.6073           | 300.4315  | 388.2095  | 688.6943  |   |
| 743.9409           | 793.6977  | 898.8435  | 926.3996  |   |
| 939.0128           | 943.2485  | 976.766   | 987.5526  |   |
| 1043.717           | 1128.3    | 1139.146  | 1139.522  |   |
| 1292.776           | 1303.239  | 1334.896  | 1394.633  |   |
| 1464.088           | 1470.698  | 1701.634  | 3003.94   |   |
| 3006.221           | 3017.847  | 3018.132  | 3210.864  |   |
| 3234.8             | 3244.353  |           |           |   |

i8

| Atom               | X         | Y         | Z         | Å |
|--------------------|-----------|-----------|-----------|---|
| C                  | 0.081956  | 1.051254  | 0.169495  |   |
| C                  | -1.213994 | 0.456845  | -0.301479 |   |
| C                  | 1.223502  | 0.141694  | 0.025726  |   |
| C                  | -1.607130 | -0.921498 | 0.097243  |   |
| H                  | -2.510063 | -1.244706 | -0.421362 |   |
| H                  | -1.961181 | 1.141655  | -0.681725 |   |
| H                  | 0.294982  | 1.974118  | -0.376339 |   |
| H                  | 0.010152  | 1.334861  | 1.231711  |   |
| C                  | 2.149477  | -0.612662 | -0.093219 |   |
| H                  | -0.806466 | -1.635603 | -0.117018 |   |
| H                  | -1.804135 | -0.987665 | 1.177807  |   |
| H                  | 2.973850  | -1.276454 | -0.199676 |   |
| Frequencies (cm-1) |           |           |           |   |
| 167.859            | 63.544    | 120.335   | 327.390   |   |
| 343.223            | 381.961   | 595.822   | 704.017   |   |
| 717.051            | 865.228   | 882.934   | 950.838   |   |
| 996.233            | 1099.564  | 1156.167  | 1235.297  |   |
| 1336.424           | 1372.381  | 1423.630  | 1458.572  |   |
| 1479.723           | 1490.130  | 2253.334  | 2983.785  |   |
| 2998.213           | 3082.724  | 3093.313  | 3142.894  |   |
| 3212.915           | 3495.766  |           |           |   |

i9

| Atom               | X         | Y         | Z         | Å |
|--------------------|-----------|-----------|-----------|---|
| C                  | 0.129026  | -0.336324 | -0.000023 |   |
| C                  | -1.298597 | -0.641663 | 0.000033  |   |
| C                  | 1.317496  | -0.059626 | -0.000005 |   |
| C                  | -2.170042 | 0.619966  | -0.000017 |   |
| H                  | -1.529583 | -1.256807 | 0.875838  |   |
| H                  | -3.227742 | 0.351679  | 0.000004  |   |
| H                  | -1.529633 | -1.256886 | -0.875706 |   |
| C                  | 2.659245  | 0.246299  | 0.000004  |   |
| H                  | -1.965253 | 1.226165  | -0.883236 |   |
| H                  | -1.965239 | 1.226261  | 0.883133  |   |
| H                  | 3.403829  | -0.537777 | -0.000141 |   |
| H                  | 2.990847  | 1.275463  | 0.000156  |   |
| Frequencies (cm-1) |           |           |           |   |
| 61.375             | 131.389   | 162.488   | 269.814   |   |
| 318.545            | 434.645   | 520.690   | 658.813   |   |
| 744.919            | 778.379   | 991.206   | 1032.384  |   |
| 1093.137           | 1095.906  | 1234.733  | 1282.844  |   |
| 1356.733           | 1412.603  | 1464.580  | 1475.716  |   |
| 1500.471           | 1510.295  | 2161.006  | 3052.104  |   |
| 3073.552           | 3082.018  | 3151.231  | 3154.872  |   |
| 3180.197           | 3278.286  |           |           |   |

i10

| Atom | X        | Y        | Z         | Å |
|------|----------|----------|-----------|---|
| C    | 0.009425 | 1.006056 | -0.008522 |   |

|                    |           |           |           |
|--------------------|-----------|-----------|-----------|
| C                  | 0.999928  | -0.027614 | 0.467478  |
| C                  | -1.355469 | 0.439927  | -0.115558 |
| C                  | 1.993688  | -0.502928 | -0.272486 |
| H                  | 0.844102  | -0.403483 | 1.475732  |
| H                  | 2.161015  | -0.151418 | -1.285721 |
| H                  | -0.009831 | 1.851967  | 0.687442  |
| C                  | -1.923645 | -0.738508 | -0.059192 |
| H                  | 2.673274  | -1.255532 | 0.109278  |
| H                  | 0.317682  | 1.402750  | -0.980568 |
| H                  | -1.333970 | -1.643625 | 0.097564  |
| H                  | -2.995833 | -0.862253 | -0.174046 |
| Frequencies (cm-1) |           |           |           |
| 78.3572            | 165.1749  | 215.9684  | 412.2725  |
| 442.2757           | 499.7832  | 669.4313  | 903.2704  |
| 911.0968           | 918.9612  | 943.5835  | 972.2843  |
| 1029.051           | 1041.713  | 1122.323  | 1242.91   |
| 1305.748           | 1326.79   | 1412.553  | 1447.292  |
| 1466.865           | 1729.217  | 1753.092  | 3052.056  |
| 3093.358           | 3094.66   | 3159.934  | 3174.671  |
| 3200.178           | 3251.601  |           |           |

| i11                |           |           |           |   |
|--------------------|-----------|-----------|-----------|---|
| Atom               | X         | Y         | Z         | Å |
| C                  | -0.057923 | 0.645662  | -0.257600 |   |
| C                  | -1.241858 | -0.007788 | 0.420980  |   |
| C                  | 1.100165  | -0.310109 | -0.358171 |   |
| C                  | -2.399424 | -0.227612 | -0.147220 |   |
| H                  | -1.078961 | -0.330856 | 1.453251  |   |
| H                  | 0.921662  | -1.206974 | -0.947140 |   |
| H                  | -0.361872 | 0.975413  | -1.254620 |   |
| C                  | 2.276002  | -0.131897 | 0.232116  |   |
| H                  | -3.343334 | -0.670387 | 0.131690  |   |
| H                  | 0.247582  | 1.529106  | 0.311029  |   |
| H                  | 3.074894  | -0.857233 | 0.135084  |   |
| H                  | 2.478257  | 0.751395  | 0.830078  |   |
| Frequencies (cm-1) |           |           |           |   |
| 84.3871            | 99.6296   | 316.8966  | 369.549   |   |
| 443.8558           | 634.4611  | 687.3214  | 802.2613  |   |
| 865.4719           | 911.4792  | 958.8434  | 971.5437  |   |
| 1037.215           | 1061.992  | 1140.131  | 1231.082  |   |
| 1272.694           | 1310.997  | 1328.903  | 1450.543  |   |
| 1478.819           | 1693.847  | 1731.1    | 3062.573  |   |
| 3082.508           | 3113.042  | 3157.933  | 3170.673  |   |
| 3249.884           | 3271.614  |           |           |   |

| i13  |           |          |           |   |
|------|-----------|----------|-----------|---|
| Atom | X         | Y        | Z         | Å |
| C    | -0.369529 | 1.058355 | -0.000049 |   |
| C    | -1.545953 | 0.117127 | 0.000086  |   |
| C    | 0.578946  | 0.037170 | -0.000013 |   |



|                    |           |           |           |   |
|--------------------|-----------|-----------|-----------|---|
| C                  | -0.499261 | -1.043232 | -0.000085 | Å |
| H                  | -2.183986 | 0.159626  | 0.887321  |   |
| H                  | -2.184591 | 0.159762  | -0.886664 |   |
| H                  | -0.292580 | 2.138513  | -0.000351 |   |
| C                  | 1.949418  | -0.011666 | 0.000083  |   |
| H                  | -0.517059 | -1.673164 | 0.890386  |   |
| H                  | -0.516913 | -1.672679 | -0.890892 |   |
| H                  | 2.476676  | -0.956758 | -0.000009 |   |
| H                  | 2.536730  | 0.898172  | 0.000078  |   |
| Frequencies (cm-1) |           |           |           |   |
| 172.8419           | 336.5392  | 415.3359  | 539.5901  |   |
| 668.6985           | 699.4984  | 797.9414  | 807.5175  |   |
| 887.7649           | 927.0214  | 953.1469  | 1012.367  |   |
| 1026.735           | 1088.91   | 1184.506  | 1207.468  |   |
| 1217.109           | 1256.986  | 1342.942  | 1360.536  |   |
| 1463.016           | 1489.23   | 1504.808  | 3057.844  |   |
| 3089.618           | 3098.293  | 3144.974  | 3172.805  |   |
| 3217.435           | 3272.124  |           |           |   |

|                    |           |           |           |   |    |
|--------------------|-----------|-----------|-----------|---|----|
| i14                |           |           |           |   | P1 |
| Atom               | X         | Y         | Z         | Å |    |
| C                  | 0.002615  | 0.494697  | 1.103437  |   |    |
| C                  | 0.002615  | 1.519506  | 0.000000  |   |    |
| C                  | -0.002723 | -0.562939 | 0.000000  |   |    |
| C                  | 0.002615  | 0.494697  | -1.103437 |   |    |
| H                  | -0.880612 | 0.485764  | 1.753014  |   |    |
| H                  | 0.019577  | 2.598926  | 0.000000  |   |    |
| H                  | 0.891941  | 0.480501  | 1.745368  |   |    |
| C                  | -0.008702 | -1.885420 | 0.000000  |   |    |
| H                  | -0.880612 | 0.485764  | -1.753014 |   |    |
| H                  | 0.891941  | 0.480501  | -1.745368 |   |    |
| H                  | -0.010380 | -2.447351 | -0.927511 |   |    |
| H                  | -0.010380 | -2.447351 | 0.927511  |   |    |
| Frequencies (cm-1) |           |           |           |   |    |
| 65.881             | 161.708   | 346.788   | 401.414   |   |    |
| 635.018            | 687.269   | 833.161   | 858.885   |   |    |
| 902.191            | 930.252   | 961.781   | 976.800   |   |    |
| 1024.293           | 1037.030  | 1122.313  | 1194.008  |   |    |
| 1222.400           | 1264.270  | 1311.661  | 1433.852  |   |    |
| 1442.949           | 1462.204  | 1780.540  | 3022.320  |   |    |
| 3027.444           | 3056.191  | 3058.639  | 3161.988  |   |    |
| 3248.293           | 3250.508  |           |           |   |    |

|      |           |           |           |   |
|------|-----------|-----------|-----------|---|
| Atom | X         | Y         | Z         | Å |
| C    | -0.027260 | 1.043996  | -0.000020 |   |
| C    | -1.346808 | 0.309074  | 0.000050  |   |
| C    | 1.150185  | 0.178955  | -0.000106 |   |
| C    | -1.499054 | -1.007777 | -0.000003 |   |
| H    | -2.220521 | 0.955151  | 0.000221  |   |
| H    | 0.016229  | 1.702750  | -0.874049 |   |

|   |           |           |           |
|---|-----------|-----------|-----------|
| H | 0.016289  | 1.702784  | 0.873981  |
| C | 2.113874  | -0.535842 | 0.000067  |
| H | -0.643776 | -1.674516 | -0.000239 |
| H | -2.486410 | -1.452810 | -0.000013 |
| H | 2.972564  | -1.163792 | 0.000172  |

| Frequencies (cm-1) |          |          |          |
|--------------------|----------|----------|----------|
| 154.743            | 171.312  | 347.388  | 395.533  |
| 577.499            | 619.318  | 715.103  | 729.267  |
| 884.129            | 954.742  | 975.184  | 986.003  |
| 1038.582           | 1094.437 | 1242.741 | 1327.739 |
| 1360.065           | 1442.228 | 1466.358 | 1736.674 |
| 2258.615           | 3054.289 | 3082.244 | 3165.433 |
| 3179.379           | 3259.835 | 3495.305 |          |

| P2   |           |           |           |   |
|------|-----------|-----------|-----------|---|
| Atom | X         | Y         | Z         | Å |
| C    | 0.017657  | 0.535997  | 0.000049  |   |
| C    | 1.134020  | -0.411614 | 0.000077  |   |
| C    | -1.240911 | 0.171557  | 0.000039  |   |
| C    | 2.413120  | -0.037747 | -0.000058 |   |
| H    | 0.870473  | -1.464889 | 0.000099  |   |
| H    | 3.213509  | -0.766468 | -0.000110 |   |
| H    | 0.255369  | 1.597314  | 0.000003  |   |
| C    | -2.487790 | -0.200956 | -0.000053 |   |
| H    | 2.693277  | 1.010412  | -0.000132 |   |
| H    | -3.024530 | -0.359917 | -0.929520 |   |
| H    | -3.024677 | -0.359877 | 0.929333  |   |

| Frequencies (cm-1) |          |          |          |
|--------------------|----------|----------|----------|
| 121.754            | 166.221  | 357.065  | 403.844  |
| 507.504            | 575.412  | 734.715  | 899.258  |
| 910.583            | 924.763  | 953.508  | 1010.975 |
| 1036.803           | 1115.005 | 1194.294 | 1304.532 |
| 1339.771           | 1441.801 | 1488.009 | 1711.984 |
| 2068.964           | 3151.093 | 3163.114 | 3169.333 |
| 3191.391           | 3232.287 | 3263.143 |          |

| P3   |           |           |           |   |
|------|-----------|-----------|-----------|---|
| Atom | X         | Y         | Z         | Å |
| C    | -0.000224 | 0.987651  | 0.734897  |   |
| C    | -0.000224 | -0.280790 | 1.176055  |   |
| C    | -0.000224 | 0.987651  | -0.734897 |   |
| C    | 0.000349  | -1.214058 | 0.000000  |   |
| H    | 0.000030  | -0.606454 | 2.206908  |   |
| H    | 0.000282  | 1.877763  | 1.349762  |   |
| H    | 0.000282  | 1.877763  | -1.349762 |   |
| C    | -0.000224 | -0.280790 | -1.176055 |   |
| H    | 0.879840  | -1.869060 | 0.000000  |   |
| H    | -0.877193 | -1.871543 | 0.000000  |   |
| H    | 0.000030  | -0.606454 | -2.206908 |   |

Frequencies (cm-1)

|          |          |          |          |
|----------|----------|----------|----------|
| 63.544   | 120.335  | 167.859  | 327.390  |
| 343.223  | 381.961  | 595.822  | 704.017  |
| 717.051  | 865.228  | 882.934  | 950.838  |
| 996.233  | 1099.564 | 1156.167 | 1235.297 |
| 1336.424 | 1372.381 | 1423.630 | 1458.572 |
| 1479.723 | 1490.130 | 2253.334 | 2983.785 |
| 2998.213 | 3082.724 | 3093.313 |          |

P4

| Atom | X         | Y         | Z         | Å |
|------|-----------|-----------|-----------|---|
| C    | -0.084314 | 0.490694  | -0.000073 |   |
| C    | 0.917163  | -0.392626 | -0.000119 |   |
| C    | -1.463757 | 0.118103  | 0.000040  |   |
| C    | 2.365059  | -0.020445 | 0.000071  |   |
| H    | 0.673845  | -1.451863 | -0.000165 |   |
| H    | 2.869481  | -0.431951 | 0.878642  |   |
| H    | 0.130222  | 1.556059  | -0.000174 |   |
| C    | -2.630582 | -0.173377 | 0.000036  |   |
| H    | 2.496450  | 1.062440  | 0.000421  |   |
| H    | 2.869598  | -0.431514 | -0.878579 |   |
| H    | -3.661007 | -0.437266 | 0.000126  |   |

Frequencies (cm-1)

|          |          |          |          |
|----------|----------|----------|----------|
| 169.546  | 170.689  | 202.131  | 393.963  |
| 460.914  | 550.477  | 682.335  | 727.742  |
| 825.057  | 916.679  | 993.349  | 1052.588 |
| 1073.232 | 1136.833 | 1309.356 | 1330.810 |
| 1415.816 | 1483.183 | 1494.404 | 1732.157 |
| 2240.880 | 3056.490 | 3113.338 | 3144.769 |
| 3172.386 | 3183.235 | 3495.442 |          |

P5

| Atom | X         | Y         | Z         | Å |
|------|-----------|-----------|-----------|---|
| C    | 0.525845  | -1.061768 | 0.000075  |   |
| C    | 1.492462  | 0.115057  | -0.000091 |   |
| C    | -0.549401 | 0.036826  | 0.000251  |   |
| C    | 0.523622  | 1.045561  | 0.000061  |   |
| H    | 0.540684  | -1.689423 | 0.893658  |   |
| H    | 2.573649  | 0.165339  | -0.000555 |   |
| H    | 0.540315  | -1.689009 | -0.893898 |   |
| C    | -1.876343 | 0.034364  | -0.000088 |   |
| H    | 0.520508  | 2.128128  | 0.000117  |   |
| H    | -2.439617 | 0.960321  | -0.000314 |   |
| H    | -2.432649 | -0.895595 | -0.000256 |   |

Frequencies (cm-1)

|          |          |          |          |
|----------|----------|----------|----------|
| 207.797  | 338.662  | 487.559  | 709.280  |
| 721.003  | 786.864  | 882.882  | 915.260  |
| 918.816  | 968.469  | 985.038  | 1015.991 |
| 1110.498 | 1110.510 | 1195.952 | 1219.168 |
| 1325.944 | 1439.423 | 1475.128 | 1623.440 |
| 1772.065 | 3078.906 | 3131.084 | 3169.564 |

3219.717 3249.476 3258.293

A1-1

| Atom | X         | Y         | Z         | Å |
|------|-----------|-----------|-----------|---|
| C    | -0.634313 | 0.000061  | 0.000023  |   |
| C    | -1.946052 | -0.000095 | -0.000028 |   |
| C    | 0.634309  | 0.000366  | 0.000064  |   |
| H    | -2.505821 | 0.928735  | 0.000072  |   |
| H    | -2.505557 | -0.929090 | -0.000238 |   |
| C    | 1.946053  | -0.000148 | 0.000126  |   |
| H    | 2.506063  | 0.928536  | -0.000629 |   |
| H    | 2.505331  | -0.929282 | -0.000319 |   |

Frequencies (cm-1)

|          |          |          |          |
|----------|----------|----------|----------|
| 226.291  | 230.883  | 373.855  | 580.087  |
| 775.091  | 911.182  | 912.490  | 915.913  |
| 1022.344 | 1038.883 | 1405.034 | 1464.898 |
| 1709.139 | 2239.646 | 3156.434 | 3159.297 |
| 3242.765 | 3242.994 |          |          |

A1-2

| Atom | X         | Y         | Z        | Å |
|------|-----------|-----------|----------|---|
| C    | 0.000000  | 0.000000  | 0.000000 |   |
| H    | 0.000000  | 1.079107  | 0.000000 |   |
| H    | 0.934534  | -0.539553 | 0.000000 |   |
| H    | -0.934534 | -0.539553 | 0.000000 |   |

Frequencies (cm-1)

|          |          |          |          |
|----------|----------|----------|----------|
| 446.315  | 1413.618 | 1413.670 | 3141.674 |
| 3322.572 | 3322.576 |          |          |

Ts1

| Atom | X         | Y         | Z         | Å |
|------|-----------|-----------|-----------|---|
| C    | 2.441353  | -0.085329 | -0.000400 |   |
| H    | 2.939880  | 0.179914  | -0.924842 |   |
| H    | 2.940674  | 0.181096  | 0.923273  |   |
| C    | 1.203079  | -0.650934 | 0.000492  |   |
| H    | 0.785400  | -1.051597 | -0.915971 |   |
| H    | 0.786211  | -1.050450 | 0.917828  |   |
| C    | -2.507897 | -0.454156 | -0.000190 |   |
| H    | -3.402656 | -1.029228 | -0.000315 |   |
| C    | -1.511183 | 0.231104  | -0.000053 |   |
| C    | -0.299096 | 0.942519  | 0.000108  |   |
| H    | -0.003653 | 1.435533  | 0.917691  |   |
| H    | -0.003398 | 1.435514  | -0.917403 |   |

Frequencies (cm-1)

|          |          |          |          |
|----------|----------|----------|----------|
| -617.590 | 62.723   | 121.116  | 243.683  |
| 361.996  | 397.021  | 457.821  | 614.038  |
| 629.199  | 703.801  | 807.470  | 816.561  |
| 891.026  | 1009.796 | 1036.390 | 1040.564 |
| 1066.548 | 1236.970 | 1291.238 | 1455.523 |
| 1465.832 | 1576.847 | 2146.366 | 3158.992 |

3163.398 3166.826 3240.082 3255.319  
 3266.046 3490.248

Ts2

| Atom               | X         | Y         | Z         | Å |
|--------------------|-----------|-----------|-----------|---|
| C                  | -0.264664 | 0.937512  | -0.100512 |   |
| C                  | 1.408979  | -0.243171 | 0.625396  |   |
| C                  | -1.347058 | 0.298068  | -0.099911 |   |
| C                  | 2.293619  | -0.336951 | -0.401526 |   |
| H                  | 1.571954  | 0.470398  | 1.425486  |   |
| H                  | 0.752068  | -1.072037 | 0.857702  |   |
| H                  | 0.173952  | 1.886422  | -0.335380 |   |
| C                  | -2.425012 | -0.484638 | -0.052058 |   |
| H                  | 3.045356  | 0.424404  | -0.572061 |   |
| H                  | 2.226875  | -1.137126 | -1.128129 |   |
| H                  | -2.723831 | -1.069492 | -0.913096 |   |
| H                  | -3.041556 | -0.527489 | 0.837139  |   |
| Frequencies (cm-1) |           |           |           |   |
| -631.000           | 47.219    | 133.698   | 220.996   |   |
| 326.673            | 378.945   | 425.491   | 490.994   |   |
| 699.650            | 740.219   | 809.130   | 818.581   |   |
| 899.775            | 995.480   | 1027.917  | 1036.556  |   |
| 1162.411           | 1237.404  | 1302.152  | 1464.296  |   |
| 1465.684           | 1581.949  | 1918.707  | 3161.479  |   |
| 3169.053           | 3171.181  | 3244.552  | 3260.319  |   |
| 3270.357           | 3366.343  |           |           |   |

Ts3

| Atom               | X         | Y         | Z         | Å |
|--------------------|-----------|-----------|-----------|---|
| C                  | 0.423443  | -1.182576 | 0.141019  |   |
| C                  | 1.207873  | 0.115214  | -0.224086 |   |
| C                  | -0.987213 | -0.788408 | -0.032685 |   |
| C                  | 0.408237  | 1.323876  | 0.175407  |   |
| H                  | 1.364811  | 0.127722  | -1.304475 |   |
| H                  | 2.192751  | 0.104812  | 0.253734  |   |
| H                  | 0.723109  | -2.024523 | -0.483744 |   |
| H                  | 0.593204  | -1.468359 | 1.183096  |   |
| C                  | -1.577592 | 0.293884  | -0.097654 |   |
| H                  | 0.302322  | 1.540822  | 1.232861  |   |
| H                  | 0.380359  | 2.180566  | -0.486202 |   |
| H                  | -2.405045 | 0.967030  | -0.167277 |   |
| Frequencies (cm-1) |           |           |           |   |
| -667.310           | 172.288   | 333.309   | 466.352   |   |
| 511.713            | 587.046   | 694.413   | 705.369   |   |
| 806.651            | 821.938   | 879.828   | 913.258   |   |
| 1002.031           | 1056.968  | 1100.744  | 1196.858  |   |
| 1228.307           | 1313.884  | 1345.131  | 1465.007  |   |
| 1478.029           | 1495.825  | 1957.397  | 3062.583  |   |
| 3076.878           | 3114.811  | 3133.579  | 3152.589  |   |
| 3253.789           | 3421.953  |           |           |   |

| Ts4                |           |           |           |   |
|--------------------|-----------|-----------|-----------|---|
| Atom               | X         | Y         | Z         | Å |
| C                  | -0.005654 | 1.026418  | -0.165127 |   |
| C                  | 1.307407  | 0.291111  | 0.022045  |   |
| C                  | -1.186181 | 0.177011  | -0.029566 |   |
| C                  | 1.463702  | -1.034200 | -0.118226 |   |
| H                  | 1.279316  | 0.466728  | 1.927389  |   |
| H                  | 2.183800  | 0.931897  | 0.058564  |   |
| H                  | -0.073676 | 1.849076  | 0.551460  |   |
| H                  | -0.007249 | 1.481088  | -1.162022 |   |
| C                  | -2.150442 | -0.528370 | 0.080852  |   |
| H                  | 0.607867  | -1.690567 | -0.225905 |   |
| H                  | 2.447394  | -1.483910 | -0.073012 |   |
| H                  | -3.010441 | -1.146134 | 0.183656  |   |
| Frequencies (cm-1) |           |           |           |   |
| -808.930           | 111.448   | 170.075   | 343.969   |   |
| 382.648            | 410.877   | 493.031   | 586.143   |   |
| 630.943            | 707.271   | 726.568   | 883.856   |   |
| 939.519            | 957.001   | 976.197   | 1048.296  |   |
| 1093.758           | 1242.284  | 1313.248  | 1360.345  |   |
| 1436.333           | 1468.196  | 1660.395  | 2259.666  |   |
| 3058.690           | 3099.769  | 3171.479  | 3180.931  |   |
| 3269.504           | 3495.121  |           |           |   |

| Ts5                |           |           |           |   |
|--------------------|-----------|-----------|-----------|---|
| Atom               | X         | Y         | Z         | Å |
| C                  | 0.400876  | -1.198819 | -0.000064 |   |
| C                  | 1.322153  | 0.034743  | 0.000172  |   |
| C                  | -0.862859 | -0.864292 | -0.000174 |   |
| C                  | 0.479870  | 1.286466  | -0.000164 |   |
| H                  | 1.971302  | 0.001254  | 0.880113  |   |
| H                  | 1.971971  | 0.001182  | -0.879269 |   |
| H                  | 0.807440  | -2.202163 | -0.000183 |   |
| C                  | -1.582461 | 0.277585  | 0.000132  |   |
| H                  | 0.386279  | 1.855288  | 0.916069  |   |
| H                  | 0.386384  | 1.854736  | -0.916755 |   |
| H                  | -2.034268 | 0.637564  | 0.920408  |   |
| H                  | -2.034586 | 0.638041  | -0.919794 |   |
| Frequencies (cm-1) |           |           |           |   |
| -690.400           | 98.270    | 366.161   | 470.328   |   |
| 518.464            | 629.233   | 680.729   | 743.142   |   |
| 828.639            | 892.990   | 894.821   | 919.852   |   |
| 1026.036           | 1044.444  | 1073.466  | 1107.700  |   |
| 1241.894           | 1247.625  | 1320.836  | 1461.390  |   |
| 1481.519           | 1497.972  | 1860.135  | 3058.134  |   |
| 3095.968           | 3137.428  | 3165.203  | 3215.296  |   |
| 3222.040           | 3264.386  |           |           |   |

Ts6

| Atom               | X         | Y         | Z         | Å |
|--------------------|-----------|-----------|-----------|---|
| C                  | 1.163300  | 0.343472  | -0.035829 |   |
| C                  | -0.080488 | 1.220481  | 0.024593  |   |
| C                  | 0.908187  | -1.049161 | -0.122503 |   |
| C                  | -1.232428 | 0.191743  | -0.018843 |   |
| H                  | -0.084757 | 1.895561  | -0.834641 |   |
| H                  | -0.103817 | 1.846309  | 0.919019  |   |
| H                  | 2.147543  | 0.766556  | -0.219861 |   |
| H                  | 1.458135  | -0.430488 | 0.932100  |   |
| C                  | -0.524344 | -1.139246 | 0.012728  |   |
| H                  | -1.917975 | 0.289278  | 0.829257  |   |
| H                  | -1.847726 | 0.303480  | -0.919114 |   |
| H                  | -1.056762 | -2.074429 | 0.132361  |   |
| Frequencies (cm-1) |           |           |           |   |
| -1039.670          | 72.485    | 411.573   | 558.493   |   |
| 673.698            | 740.172   | 788.988   | 809.739   |   |
| 909.257            | 923.739   | 985.662   | 1012.455  |   |
| 1076.781           | 1126.096  | 1193.621  | 1230.341  |   |
| 1256.049           | 1291.618  | 1316.637  | 1341.362  |   |
| 1401.880           | 1459.151  | 1486.725  | 2148.853  |   |
| 3042.870           | 3074.078  | 3082.645  | 3122.621  |   |
| 3176.308           | 3215.919  |           |           |   |

| Ts7                |           |           |           |   |
|--------------------|-----------|-----------|-----------|---|
| Atom               | X         | Y         | Z         | Å |
| C                  | -0.027857 | -0.959372 | -0.042115 |   |
| C                  | -1.397788 | -0.364308 | -0.006582 |   |
| C                  | 1.111328  | -0.240073 | -0.149568 |   |
| C                  | -1.672112 | 0.980716  | -0.030971 |   |
| H                  | -2.199324 | -1.088280 | -0.099774 |   |
| H                  | -0.744210 | -0.807018 | 1.106163  |   |
| H                  | 0.015396  | -2.035970 | -0.167324 |   |
| C                  | 2.183627  | 0.470767  | 0.049724  |   |
| H                  | -2.694806 | 1.327746  | -0.010137 |   |
| H                  | -0.875692 | 1.714022  | -0.032975 |   |
| H                  | 2.535212  | 0.706797  | 1.055119  |   |
| H                  | 2.780234  | 0.856325  | -0.774001 |   |
| Frequencies (cm-1) |           |           |           |   |
| -1921.300          | 141.252   | 172.229   | 295.998   |   |
| 379.050            | 483.169   | 614.458   | 656.585   |   |
| 756.852            | 786.804   | 899.058   | 923.322   |   |
| 996.554            | 999.568   | 1017.300  | 1101.402  |   |
| 1160.832           | 1283.597  | 1354.239  | 1418.144  |   |
| 1462.127           | 1553.213  | 1630.800  | 1944.391  |   |
| 3089.818           | 3166.357  | 3185.993  | 3190.514  |   |
| 3205.822           | 3289.337  |           |           |   |

| Ts8  |           |          |           |   |
|------|-----------|----------|-----------|---|
| Atom | X         | Y        | Z         | Å |
| C    | -0.125609 | 1.002455 | -0.000005 |   |

|                    |           |           |           |
|--------------------|-----------|-----------|-----------|
| C                  | -1.491038 | 0.343619  | 0.000033  |
| C                  | 0.823723  | -0.163171 | -0.000135 |
| C                  | -1.456373 | -0.977561 | 0.000038  |
| H                  | -2.401935 | 0.935482  | 0.000028  |
| H                  | -0.091174 | -1.144782 | -0.000088 |
| H                  | 0.015261  | 1.636736  | -0.881362 |
| C                  | 2.131476  | -0.305231 | 0.000051  |
| H                  | -2.226358 | -1.737554 | -0.000063 |
| H                  | 0.015239  | 1.636691  | 0.881385  |
| H                  | 2.598179  | -1.284518 | 0.000112  |
| H                  | 2.797711  | 0.557277  | 0.000103  |
| Frequencies (cm-1) |           |           |           |
| -1775.880          | 115.201   | 289.442   | 339.963   |
| 557.089            | 576.613   | 646.046   | 713.238   |
| 890.569            | 912.056   | 917.468   | 934.584   |
| 973.875            | 998.440   | 1072.022  | 1096.411  |
| 1170.075           | 1252.297  | 1292.641  | 1424.069  |
| 1465.169           | 1655.791  | 1753.786  | 1758.090  |
| 3054.940           | 3088.934  | 3112.753  | 3180.269  |
| 3211.830           | 3248.384  |           |           |

| Ts9                |           |           |           |   |
|--------------------|-----------|-----------|-----------|---|
| Atom               | X         | Y         | Z         | Å |
| C                  | 0.261536  | -1.178233 | 0.158032  |   |
| C                  | 1.286401  | -0.056883 | -0.003843 |   |
| C                  | -1.035292 | -0.553426 | -0.273598 |   |
| C                  | 0.839348  | 1.169610  | -0.168157 |   |
| H                  | 2.348632  | -0.293234 | 0.033909  |   |
| H                  | -1.507473 | -0.895114 | -1.187626 |   |
| H                  | 0.524811  | -2.046731 | -0.448354 |   |
| C                  | -1.319143 | 0.677869  | 0.230643  |   |
| H                  | 1.299793  | 2.141104  | -0.280517 |   |
| H                  | 0.242124  | -1.509391 | 1.203471  |   |
| H                  | -2.088019 | 1.298675  | -0.215731 |   |
| H                  | -1.016968 | 0.951069  | 1.236387  |   |
| Frequencies (cm-1) |           |           |           |   |
| -672.480           | 242.573   | 322.261   | 467.703   |   |
| 607.888            | 646.024   | 708.008   | 816.060   |   |
| 883.886            | 909.988   | 921.618   | 935.645   |   |
| 962.913            | 995.707   | 1091.630  | 1196.985  |   |
| 1211.727           | 1273.456  | 1314.315  | 1425.713  |   |
| 1482.126           | 1582.594  | 1660.449  | 3043.712  |   |
| 3115.053           | 3146.046  | 3152.526  | 3200.766  |   |
| 3240.589           | 3255.674  |           |           |   |

| Ts10 |          |           |           |   |
|------|----------|-----------|-----------|---|
| Atom | X        | Y         | Z         | Å |
| C    | 1.180944 | -0.135650 | -0.117879 |   |



|                    |           |           |           |
|--------------------|-----------|-----------|-----------|
| C                  | 0.290378  | -1.161707 | -0.092087 |
| C                  | 0.431383  | 1.137248  | -0.091024 |
| C                  | -1.096113 | -0.611498 | 0.052324  |
| H                  | 1.772856  | -0.020421 | 1.672619  |
| H                  | 0.525820  | -2.215568 | -0.134539 |
| H                  | 2.236078  | -0.221977 | -0.340277 |
| H                  | 0.891547  | 2.115427  | -0.122776 |
| C                  | -0.878183 | 0.875264  | 0.014473  |
| H                  | -1.762017 | -0.956187 | -0.747461 |
| H                  | -1.559309 | -0.925745 | 0.997544  |
| H                  | -1.675427 | 1.602529  | 0.080046  |
| Frequencies (cm-1) |           |           |           |
| -841.400           | 273.634   | 356.694   | 396.585   |
| 565.481            | 702.281   | 727.631   | 809.579   |
| 816.305            | 925.285   | 937.912   | 976.280   |
| 978.581            | 1006.352  | 1017.236  | 1105.851  |
| 1126.162           | 1134.735  | 1274.382  | 1321.178  |
| 1398.752           | 1418.467  | 1545.894  | 1649.287  |
| 3039.460           | 3075.965  | 3228.472  | 3236.873  |
| 3254.091           | 3259.811  |           |           |

| Ts11               |           |           |           |   |
|--------------------|-----------|-----------|-----------|---|
| Atom               | X         | Y         | Z         | Å |
| C                  | 0.018961  | 0.538760  | 0.140735  |   |
| C                  | -1.108294 | -0.389229 | -0.056677 |   |
| C                  | 1.272402  | 0.185355  | 0.016196  |   |
| C                  | -2.385430 | 0.038521  | -0.165155 |   |
| H                  | -0.850149 | -1.401315 | -0.352593 |   |
| H                  | -1.076183 | -1.088114 | 1.663818  |   |
| H                  | -0.217898 | 1.569709  | 0.391714  |   |
| C                  | 2.515672  | -0.179154 | -0.105327 |   |
| H                  | -3.188680 | -0.647497 | -0.399052 |   |
| H                  | -2.647513 | 1.072082  | 0.030339  |   |
| H                  | 3.076668  | -0.541968 | 0.749578  |   |
| H                  | 3.023888  | -0.128416 | -1.062437 |   |
| Frequencies (cm-1) |           |           |           |   |
| -951.450           | 101.720   | 164.682   | 344.593   |   |
| 377.674            | 425.424   | 467.873   | 533.529   |   |
| 575.052            | 709.546   | 902.612   | 904.420   |   |
| 917.503            | 921.403   | 1012.258  | 1065.434  |   |
| 1113.961           | 1183.487  | 1293.119  | 1319.917  |   |
| 1436.099           | 1485.306  | 1633.889  | 2072.122  |   |
| 3151.963           | 3166.674  | 3172.822  | 3186.245  |   |
| 3233.850           | 3270.742  |           |           |   |

| Ts12 |          |          |           |   |
|------|----------|----------|-----------|---|
| Atom | X        | Y        | Z         | Å |
| C    | 0.043776 | 0.864731 | -0.031338 |   |
| C    | 1.436055 | 0.425108 | -0.054975 |   |

|                    |           |           |           |
|--------------------|-----------|-----------|-----------|
| C                  | -1.039343 | -0.026081 | 0.244932  |
| C                  | 1.815189  | -0.858509 | -0.037423 |
| H                  | 2.182442  | 1.212728  | -0.074153 |
| H                  | 1.082703  | -1.658149 | -0.044208 |
| H                  | -0.406387 | 0.679486  | 1.180037  |
| C                  | -2.255109 | -0.381206 | -0.126499 |
| H                  | 2.862341  | -1.132079 | -0.014304 |
| H                  | -0.195449 | 1.858217  | -0.408059 |
| H                  | -2.575663 | -0.249093 | -1.160716 |
| H                  | -2.953396 | -0.855371 | 0.553220  |
| Frequencies (cm-1) |           |           |           |
| -1889.780          | 130.336   | 222.668   | 261.742   |
| 327.792            | 539.929   | 602.592   | 681.991   |
| 849.797            | 891.841   | 911.705   | 939.118   |
| 1009.895           | 1015.713  | 1034.371  | 1099.265  |
| 1145.837           | 1318.243  | 1336.283  | 1440.209  |
| 1448.373           | 1669.265  | 1736.195  | 2170.301  |
| 3099.521           | 3134.584  | 3170.827  | 3193.767  |
| 3216.336           | 3266.112  |           |           |

| Ts13               |           |           |           |   |
|--------------------|-----------|-----------|-----------|---|
| Atom               | X         | Y         | Z         | Å |
| C                  | -1.172938 | -0.813236 | -0.252426 |   |
| C                  | -1.154103 | 0.485965  | 0.184676  |   |
| C                  | 0.081904  | 1.204050  | -0.083995 |   |
| C                  | 1.178801  | 0.420773  | -0.090668 |   |
| C                  | 1.022030  | -1.019716 | 0.209208  |   |
| H                  | -1.885801 | -1.528400 | 0.146501  |   |
| H                  | -0.755580 | -1.064048 | -1.220462 |   |
| H                  | -1.864081 | 0.857040  | 0.915781  |   |
| H                  | 0.134013  | 2.281965  | -0.185134 |   |
| H                  | 2.165718  | 0.839711  | -0.271955 |   |
| H                  | 0.983545  | -1.303374 | 1.258762  |   |
| H                  | 1.488017  | -1.749912 | -0.444269 |   |
| Frequencies (cm-1) |           |           |           |   |
| -771.080           | 212.970   | 407.834   | 452.518   |   |
| 513.999            | 656.093   | 720.286   | 742.893   |   |
| 781.039            | 895.464   | 958.764   | 977.451   |   |
| 996.432            | 1019.701  | 1052.659  | 1072.146  |   |
| 1160.899           | 1248.638  | 1369.350  | 1429.491  |   |
| 1451.425           | 1554.568  | 1625.081  | 3123.136  |   |
| 3153.724           | 3162.619  | 3195.265  | 3216.133  |   |
| 3218.634           | 3236.891  |           |           |   |

| Ts14 |           |           |           |   |
|------|-----------|-----------|-----------|---|
| Atom | X         | Y         | Z         | Å |
| C    | 1.145996  | -0.519812 | -0.024571 |   |
| C    | -0.178943 | -1.207747 | -0.005297 |   |
| C    | 0.866287  | 0.904617  | -0.019047 |   |
| C    | -1.258483 | -0.152463 | -0.016534 |   |

|   |           |           |           |
|---|-----------|-----------|-----------|
| H | 0.695953  | -1.033786 | 1.022749  |
| H | -0.305964 | -2.251289 | -0.250497 |
| H | 2.063922  | -0.991205 | -0.345241 |
| H | 1.635629  | 1.664551  | 0.000502  |
| C | -0.461807 | 1.134775  | -0.000857 |
| H | -1.89319  | -0.229818 | -0.914938 |
| H | -1.949661 | -0.225678 | 0.834369  |
| H | -0.924984 | 2.111001  | 0.050887  |

Frequencies (cm-1)

|           |           |           |           |
|-----------|-----------|-----------|-----------|
| -1861.2   | 255.2705  | 485.461   | 548.7807  |
| 688.4297  | 730.2623  | 801.7217  | 826.8352  |
| 917.535   | 933.4454  | 948.8654  | 954.9515  |
| 1017.2649 | 1057.663  | 1122.9393 | 1137.871  |
| 1245.2592 | 1269.9769 | 1296.4494 | 1330.2007 |
| 1396.0919 | 1469.7478 | 1603.9793 | 2233.7496 |
| 2952.3484 | 3001.7804 | 3228.4881 | 3238.2799 |
| 3251.3191 | 3258.7285 |           |           |

Ts15

| Atom | X         | Y         | Z         | Å |
|------|-----------|-----------|-----------|---|
| C    | 0.334304  | 1.17071   | -0.099296 |   |
| C    | 1.163387  | 0.098833  | -0.113768 |   |
| C    | -1.04515  | 0.708673  | 0.031544  |   |
| C    | 0.335962  | -1.158239 | -0.097231 |   |
| H    | 1.55322   | 0.036466  | 1.89315   |   |
| H    | 2.231764  | 0.117394  | -0.276681 |   |
| H    | 0.636894  | 2.207912  | -0.14805  |   |
| H    | -1.906679 | 1.35879   | 0.10251   |   |
| C    | -1.063102 | -0.636879 | 0.051612  |   |
| H    | 0.449276  | -1.696003 | -1.04785  |   |
| H    | 0.619149  | -1.855201 | 0.696488  |   |
| H    | -1.936038 | -1.267946 | 0.143267  |   |

Frequencies (cm-1)

|           |           |           |           |
|-----------|-----------|-----------|-----------|
| -581.33   | 214.2272  | 359.2172  | 426.4787  |
| 530.0461  | 695.319   | 771.9743  | 814.9234  |
| 818.3977  | 911.5825  | 939.3947  | 967.698   |
| 976.9285  | 983.2187  | 1031.556  | 1108.8621 |
| 1129.0248 | 1134.8685 | 1273.7922 | 1323.1906 |
| 1403.0888 | 1421.5752 | 1542.4386 | 1641.3476 |
| 3050.1619 | 3104.5681 | 3231.1074 | 3239.8397 |
| 3254.9166 | 3261.8169 |           |           |

Ts16

| Atom | X         | Y         | Z         | Å |
|------|-----------|-----------|-----------|---|
| C    | 0.013028  | -0.029695 | 0.000248  |   |
| C    | 1.285334  | 0.746373  | -0.000162 |   |
| C    | -1.265558 | -0.016228 | 0.000050  |   |
| C    | 2.117916  | -0.543551 | -0.000013 |   |
| H    | 1.421404  | 1.365709  | -0.887589 |   |

|                    |           |           |           |
|--------------------|-----------|-----------|-----------|
| H                  | 1.421697  | 1.365923  | 0.887074  |
| H                  | 0.788679  | -1.132377 | 0.000695  |
| C                  | -2.580100 | -0.101585 | -0.000066 |
| H                  | 2.608413  | -0.834921 | -0.923302 |
| H                  | 2.609320  | -0.834162 | 0.923034  |
| H                  | -3.136737 | -0.130473 | 0.929256  |
| H                  | -3.136494 | -0.131586 | -0.929499 |
| Frequencies (cm-1) |           |           |           |
| -                  | 36.792    | 172.469   | 271.823   |
| 2110.890           | 506.214   | 517.820   | 566.649   |
| 390.466            | 850.598   | 879.186   | 935.989   |
| 777.778            | 1019.953  | 1059.629  | 1131.225  |
| 1014.413           | 1238.881  | 1327.715  | 1425.791  |
| 1221.158           | 1494.417  | 1825.244  | 2068.646  |
| 1474.947           | 3134.258  | 3140.336  | 3163.540  |
| 3091.817           | 3250.024  |           |           |
| 3246.782           |           |           |           |

| Ts17               |           |           |           |   |
|--------------------|-----------|-----------|-----------|---|
| Atom               | X         | Y         | Z         | Å |
| C                  | 0.301839  | 1.263709  | 0.22539   |   |
| C                  | -1.663044 | 0.308643  | -0.357882 |   |
| C                  | 1.176838  | 0.428777  | 0.095906  |   |
| C                  | -1.914657 | -0.834246 | 0.234193  |   |
| H                  | -2.199825 | 0.871621  | -1.11161  |   |
| H                  | -0.15863  | 2.198022  | 0.456208  |   |
| C                  | 2.036182  | -0.721985 | -0.147345 |   |
| H                  | -1.230258 | -1.247247 | 0.971376  |   |
| H                  | -2.814886 | -1.410095 | 0.020717  |   |
| H                  | 2.874285  | -0.452301 | -0.792515 |   |
| H                  | 2.437535  | -1.109877 | 0.790571  |   |
| H                  | 1.468836  | -1.519512 | -0.636321 |   |
| Frequencies (cm-1) |           |           |           |   |
| -538.5             | 81.1092   | 87.5207   | 226.8503  |   |
| 263.1598           | 301.4384  | 386.7679  | 428.1037  |   |
| 462.6825           | 564.726   | 738.033   | 792.2052  |   |
| 858.6633           | 874.2024  | 906.3543  | 1027.693  |   |
| 1046.5953          | 1397.5269 | 1417.3097 | 1424.5825 |   |
| 1462.8795          | 1639.149  | 2106.4655 | 3129.3763 |   |
| 3156.8577          | 3161.862  | 3244.2039 | 3247.8181 |   |
| 3299.0292          | 3307.1967 |           |           |   |

| Ts18 |           |           |           |   |
|------|-----------|-----------|-----------|---|
| Atom | X         | Y         | Z         | Å |
| C    | -0.005355 | -0.995669 | -0.001008 |   |
| C    | 1.345377  | -0.464926 | 0.025955  |   |
| C    | -1.098214 | -0.255927 | 0.017101  |   |
| C    | 1.623796  | 0.983908  | 0.042252  |   |
| H    | 2.150608  | -1.130172 | 0.310083  |   |
| H    | 1.690636  | 0.131554  | -1.017211 |   |

|                    |           |           |           |
|--------------------|-----------|-----------|-----------|
| H                  | -0.116169 | -2.074204 | -0.060676 |
| C                  | -2.174703 | 0.477619  | 0.006664  |
| H                  | 2.612470  | 1.335014  | 0.294403  |
| H                  | 0.806259  | 1.680294  | -0.075845 |
| H                  | -2.684883 | 0.747370  | 0.927105  |
| H                  | -2.604330 | 0.840109  | -0.923639 |
| Frequencies (cm-1) |           |           |           |
| -1830.640          | 152.944   | 183.931   | 320.087   |
| 374.736            | 409.718   | 591.040   | 643.365   |
| 661.548            | 806.706   | 893.026   | 909.113   |
| 916.205            | 1007.083  | 1013.784  | 1100.559  |
| 1213.196           | 1254.889  | 1363.064  | 1405.037  |
| 1453.013           | 1481.203  | 2019.533  | 2251.713  |
| 3126.895           | 3180.139  | 3194.480  | 3201.659  |
| 3218.031           | 3318.213  |           |           |

| Ts19               |           |           |           |   |
|--------------------|-----------|-----------|-----------|---|
| Atom               | X         | Y         | Z         | Å |
| C                  | 0.049163  | 0.967663  | -0.094804 |   |
| C                  | -1.218465 | 0.489729  | -0.14066  |   |
| C                  | 1.205201  | 0.116853  | -0.047442 |   |
| C                  | -1.608819 | -0.933391 | 0.067373  |   |
| H                  | 0.252195  | 1.528666  | 1.687057  |   |
| H                  | -2.017523 | 1.211631  | -0.278043 |   |
| H                  | 0.235064  | 2.007951  | -0.338904 |   |
| C                  | 2.182164  | -0.582495 | -0.024966 |   |
| H                  | -2.245878 | -1.28184  | -0.750071 |   |
| H                  | -0.735655 | -1.581778 | 0.13534   |   |
| H                  | 3.048178  | -1.199857 | -0.001361 |   |
| H                  | -2.19184  | -1.034924 | 0.988986  |   |
| Frequencies (cm-1) |           |           |           |   |
| -917.07            | 119.8643  | 163.1093  | 251.0531  |   |
| 312.301            | 385.2775  | 442.0139  | 573.7128  |   |
| 659.4094           | 690.3894  | 732.6548  | 779.848   |   |
| 911.6866           | 972.4844  | 1017.1391 | 1056.4802 |   |
| 1124.546           | 1249.9692 | 1391.4741 | 1429.0716 |   |
| 1482.0396          | 1485.9615 | 1635.3621 | 2245.028  |   |
| 3049.4747          | 3104.3642 | 3157.3586 | 3185.0216 |   |
| 3200.462           | 3494.5149 |           |           |   |

| Ts20 |           |           |           |   |
|------|-----------|-----------|-----------|---|
| Atom | X         | Y         | Z         | Å |
| C    | -0.001926 | 0.511217  | 0.041676  |   |
| C    | -0.992391 | -0.377579 | -0.099106 |   |
| C    | 1.372495  | 0.177049  | -0.103342 |   |
| C    | -2.441995 | -0.049023 | 0.052173  |   |
| H    | -0.734859 | -1.406013 | -0.337888 |   |
| H    | -2.987320 | -0.276875 | -0.867897 |   |
| H    | -0.228646 | 1.546737  | 0.280635  |   |
| C    | 2.546599  | -0.114661 | -0.146102 |   |

|                    |           |           |           |
|--------------------|-----------|-----------|-----------|
| H                  | -2.588128 | 1.005229  | 0.290649  |
| H                  | -2.892534 | -0.651072 | 0.846077  |
| H                  | 2.971587  | -0.785485 | 1.707982  |
| H                  | 3.563208  | -0.314535 | -0.391358 |
| Frequencies (cm-1) |           |           |           |
| -663.630           | 89.743    | 154.581   | 174.507   |
| 195.945            | 312.694   | 395.753   | 497.482   |
| 554.059            | 711.285   | 785.958   | 825.068   |
| 917.747            | 992.413   | 1056.357  | 1070.952  |
| 1137.426           | 1312.024  | 1330.523  | 1414.180  |
| 1482.334           | 1492.705  | 1716.194  | 2174.920  |
| 3056.377           | 3112.919  | 3146.151  | 3173.959  |
| 3183.275           | 3475.154  |           |           |

| Ts21               |           |           |           |   |
|--------------------|-----------|-----------|-----------|---|
| Atom               | X         | Y         | Z         | Å |
| C                  | 0.312917  | -1.048321 | -0.000203 |   |
| C                  | 1.536392  | -0.179892 | 0.00006   |   |
| C                  | -0.74285  | -0.251682 | 0.000684  |   |
| C                  | 0.775943  | 1.13494   | -0.000209 |   |
| H                  | 2.163793  | -0.314808 | 0.885213  |   |
| H                  | 2.164869  | -0.315    | -0.884302 |   |
| H                  | 0.265617  | -2.134369 | -0.00034  |   |
| C                  | -2.034552 | 0.121094  | -0.000041 |   |
| H                  | 0.705771  | 1.705923  | 0.917919  |   |
| H                  | 0.704053  | 1.704244  | -0.919243 |   |
| H                  | -2.5452   | 0.347659  | -0.92897  |   |
| H                  | -2.546002 | 0.349516  | 0.927981  |   |
| Frequencies (cm-1) |           |           |           |   |
| -864.28            | 134.4468  | 267.5459  | 330.4428  |   |
| 363.6269           | 572.6385  | 640.9237  | 762.2166  |   |
| 789.412            | 818.1171  | 867.0046  | 974.277   |   |
| 1020.239           | 1026.266  | 1033.039  | 1079.55   |   |
| 1215.304           | 1290.631  | 1314.683  | 1451.931  |   |
| 1456.24            | 1491.424  | 1899.784  | 3063.922  |   |
| 3105.503           | 3153.101  | 3156.567  | 3169.097  |   |
| 3245.097           | 3258.419  |           |           |   |

| Ts22 |           |           |           |   |
|------|-----------|-----------|-----------|---|
| Atom | X         | Y         | Z         | Å |
| C    | 0.452493  | -1.065101 | -0.025699 |   |
| C    | 1.543332  | -0.02078  | -0.002396 |   |
| C    | -0.582699 | -0.031745 | 0.010327  |   |
| C    | 0.482406  | 1.071041  | -0.002817 |   |
| H    | 1.118451  | -0.812071 | 1.001863  |   |
| H    | 2.560919  | -0.060379 | -0.361887 |   |
| H    | 0.459229  | -2.107008 | -0.315222 |   |
| C    | -1.9174   | -0.0190   | -0.0048   |   |
| H    | 0.477185  | 1.789539  | 0.818281  |   |
| H    | 0.467096  | 1.607723  | -0.955531 |   |

|                    |           |           |           |
|--------------------|-----------|-----------|-----------|
| H                  | -2.465144 | 0.915195  | 0.011463  |
| H                  | -2.486521 | -0.939672 | -0.046767 |
| Frequencies (cm-1) |           |           |           |
| -1821.24           | 208.2584  | 344.4657  | 451.4342  |
| 557.6997           | 630.272   | 713.5622  | 771.0645  |
| 865.4329           | 884.7431  | 906.6864  | 935.8858  |
| 973.0723           | 1027.2035 | 1092.4467 | 1167.1725 |
| 1187.8421          | 1235.2819 | 1266.5291 | 1295.6017 |
| 1435.3275          | 1460.3558 | 1718.3067 | 2249.8604 |
| 3073.9643          | 3128.5364 | 3172.8322 | 3233.0397 |
| 3250.0687          | 3263.1699 |           |           |

Ts23

| Atom               | X         | Y         | Z         | Å |
|--------------------|-----------|-----------|-----------|---|
| C                  | -0.102234 | 1.027478  | -0.026557 |   |
| C                  | 1.291976  | 0.495155  | -0.002575 |   |
| C                  | -1.232422 | 0.177686  | -0.022779 |   |
| C                  | 1.544154  | -0.976076 | -0.014092 |   |
| H                  | 0.574882  | 0.986101  | 1.032418  |   |
| H                  | 2.068201  | 1.20011   | -0.26788  |   |
| H                  | 0.865363  | -1.497615 | 0.665206  |   |
| H                  | -0.236591 | 2.06265   | -0.314117 |   |
| C                  | -2.195006 | -0.551564 | 0.000346  |   |
| H                  | 2.56939   | -1.204684 | 0.277106  |   |
| H                  | 1.366366  | -1.394248 | -1.01383  |   |
| H                  | -3.046419 | -1.188387 | 0.015048  |   |
| Frequencies (cm-1) |           |           |           |   |
| -1824.33           | 137       | 167.6597  | 227.111   |   |
| 348.6129           | 409.0079  | 581.9816  | 585.4461  |   |
| 621.2832           | 733.5973  | 805.0219  | 868.5215  |   |
| 980.4351           | 1038.1707 | 1103.6408 | 1192.8234 |   |
| 1250.2045          | 1359.4467 | 1373.9395 | 1424.4779 |   |
| 1480.6185          | 1495.2562 | 2183.7641 | 2233.828  |   |
| 3018.3666          | 3096.4715 | 3148.3556 | 3207.6414 |   |
| 3226.5488          | 3494.2763 |           |           |   |

Ts24

| Atom | X         | Y         | Z         | Å |
|------|-----------|-----------|-----------|---|
| C    | -0.496793 | -1.102707 | 0.087273  |   |
| C    | -1.482757 | 0.032726  | -0.123652 |   |
| C    | 0.562989  | 0.002882  | -0.019097 |   |
| C    | -0.528151 | 0.998953  | -0.124576 |   |
| H    | -0.458488 | -1.860126 | -0.699156 |   |
| H    | -2.560525 | 0.053797  | -0.213838 |   |
| H    | -0.547708 | -1.589002 | 1.065574  |   |
| C    | 1.887604  | 0.022479  | -0.050800 |   |
| H    | -0.540280 | 2.056575  | -0.355589 |   |
| H    | -0.443526 | 1.552933  | 1.716038  |   |
| H    | 2.432314  | 0.953459  | -0.156014 |   |
| H    | 2.460862  | -0.893635 | 0.028093  |   |

|          | Frequencies (cm-1) |          |          |
|----------|--------------------|----------|----------|
| -794.670 | 183.830            | 308.320  | 339.880  |
| 369.252  | 531.794            | 718.310  | 730.440  |
| 773.929  | 885.255            | 913.490  | 925.318  |
| 976.449  | 983.180            | 1013.156 | 1100.389 |
| 1109.613 | 1190.705           | 1220.213 | 1319.723 |
| 1437.935 | 1465.648           | 1551.098 | 1775.714 |
| 3068.022 | 3119.538           | 3167.608 | 3219.837 |
| 3248.199 | 3256.743           |          |          |

| Ts25      |                    |           |           |   |
|-----------|--------------------|-----------|-----------|---|
| Atom      | X                  | Y         | Z         | Å |
| C         | -0.545965          | -1.063202 | -0.006505 |   |
| C         | -1.499981          | 0.114965  | -0.119114 |   |
| C         | 0.534728           | 0.034916  | 0.085467  |   |
| C         | -0.543501          | 1.046763  | 0.002939  |   |
| H         | -0.464752          | -1.702611 | -0.888132 |   |
| H         | -2.572489          | 0.165062  | -0.254649 |   |
| H         | -0.657579          | -1.673121 | 0.892128  |   |
| C         | 1.857222           | 0.032454  | -0.165407 |   |
| H         | -0.536767          | 2.128833  | 0.013213  |   |
| H         | 2.4139             | 0.9589    | -0.2391   |   |
| H         | 2.40618            | -0.898916 | -0.232686 |   |
| H         | 0.596475           | 0.026503  | 1.924951  |   |
|           | Frequencies (cm-1) |           |           |   |
| -942.32   | 255.0557           | 322.1479  | 423.6351  |   |
| 497.5363  | 549.3127           | 652.4594  | 727.1929  |   |
| 779.7424  | 885.299            | 891.9498  | 917.6556  |   |
| 961.9193  | 982.9434           | 1008.7906 | 1103.909  |   |
| 1114.7567 | 1194.102           | 1221.5905 | 1319.623  |   |
| 1435.6922 | 1472.0464          | 1630.8752 | 1675.3591 |   |
| 3081.1225 | 3135.2789          | 3167.9517 | 3223.5247 |   |
| 3253.1017 | 3263.0147          |           |           |   |

| Ts26 |                    |           |           |   |
|------|--------------------|-----------|-----------|---|
| Atom | X                  | Y         | Z         | Å |
| C    | 0.452493           | -1.065101 | -0.025699 |   |
| C    | 1.543332           | -0.020780 | -0.002396 |   |
| C    | -0.582699          | -0.031745 | 0.010327  |   |
| C    | 0.482406           | 1.071041  | -0.002817 |   |
| H    | 1.118451           | -0.812071 | 1.001863  |   |
| H    | 2.560919           | -0.060379 | -0.361887 |   |
| H    | 0.459229           | -2.107008 | -0.315222 |   |
| C    | -1.917402          | -0.018970 | -0.004783 |   |
| H    | 0.477185           | 1.789539  | 0.818281  |   |
| H    | 0.467096           | 1.607723  | -0.955531 |   |
| H    | -2.465144          | 0.915195  | 0.011463  |   |
| H    | -2.486521          | -0.939672 | -0.046767 |   |
|      | Frequencies (cm-1) |           |           |   |



|           |          |          |          |
|-----------|----------|----------|----------|
| -1821.240 | 208.258  | 344.466  | 451.434  |
| 557.700   | 630.272  | 713.562  | 771.065  |
| 865.433   | 884.743  | 906.686  | 935.886  |
| 973.072   | 1027.204 | 1092.447 | 1167.173 |
| 1187.842  | 1235.282 | 1266.529 | 1295.602 |
| 1435.328  | 1460.356 | 1718.307 | 2249.860 |
| 3073.964  | 3128.536 | 3172.832 | 3233.040 |
| 3250.069  | 3263.170 |          |          |

Ts27

| Atom               | X         | Y         | Z         | Å |
|--------------------|-----------|-----------|-----------|---|
| C                  | 0.455592  | -1.048116 | -0.091814 |   |
| C                  | 1.441089  | -0.120088 | -0.120794 |   |
| C                  | -0.600944 | -0.034600 | -0.018920 |   |
| C                  | 0.473070  | 1.060356  | -0.096304 |   |
| H                  | 1.980538  | 0.018662  | 1.881246  |   |
| H                  | 2.511499  | -0.179065 | -0.267451 |   |
| H                  | 0.444037  | -2.130350 | -0.106817 |   |
| C                  | -1.926730 | -0.028854 | 0.077134  |   |
| H                  | 0.536705  | 1.715207  | 0.774832  |   |
| H                  | 0.444280  | 1.655186  | -1.011436 |   |
| H                  | -2.479717 | 0.902115  | 0.116002  |   |
| H                  | -2.489816 | -0.953947 | 0.117812  |   |
| Frequencies (cm-1) |           |           |           |   |
| -586.410           | 167.336   | 298.356   | 340.651   |   |
| 356.804            | 490.287   | 702.180   | 723.416   |   |
| 821.810            | 883.722   | 917.476   | 920.109   |   |
| 960.580            | 984.386   | 1010.415  | 1106.233  |   |
| 1110.880           | 1198.156  | 1220.167  | 1324.307  |   |
| 1439.804           | 1473.205  | 1568.418  | 1753.912  |   |
| 3082.601           | 3136.650  | 3169.674  | 3222.736  |   |
| 3249.272           | 3259.532  |           |           |   |

Ts28

| Atom               | X         | Y         | Z         | Å |
|--------------------|-----------|-----------|-----------|---|
| C                  | 0.014602  | -0.519298 | -0.476225 |   |
| C                  | 1.122306  | -0.460282 | 0.586515  |   |
| C                  | -1.301654 | -0.093545 | -0.137101 |   |
| C                  | 1.830963  | 0.678493  | -0.131585 |   |
| H                  | 1.702053  | -1.379155 | 0.654974  |   |
| H                  | 0.743083  | -0.199726 | 1.57281   |   |
| H                  | 0.718677  | 0.494804  | -1.033942 |   |
| H                  | 0.090649  | -1.328149 | -1.198028 |   |
| C                  | -2.394018 | 0.325253  | 0.155135  |   |
| H                  | 2.754605  | 0.46906   | -0.662032 |   |
| H                  | 1.720874  | 1.679031  | 0.274114  |   |
| H                  | -3.363132 | 0.680408  | 0.411674  |   |
| Frequencies (cm-1) |           |           |           |   |
| -1979.86           | 76.6711   | 204.7654  | 312.7916  |   |

|           |           |           |           |
|-----------|-----------|-----------|-----------|
| 463.3247  | 536.8776  | 604.8776  | 645.7776  |
| 715.0645  | 761.3543  | 868.9298  | 899.0434  |
| 925.702   | 1025.9426 | 1093.5578 | 1103.8777 |
| 1223.8268 | 1258.2833 | 1302.6362 | 1338.5881 |
| 1426.3311 | 1495.658  | 1781.7979 | 2201.5505 |
| 3114.301  | 3136.88   | 3163.1329 | 3175.3052 |
| 3248.2988 | 3494.3452 |           |           |

Ts29

| Atom | X         | Y         | Z         | Å |
|------|-----------|-----------|-----------|---|
| C    | 0.073155  | -0.952367 | 0.000121  |   |
| C    | -1.372822 | -0.52583  | -0.000103 |   |
| C    | 0.975788  | 0.098862  | -0.000034 |   |
| C    | -1.411115 | 0.981174  | 0.000064  |   |
| H    | -1.887891 | -0.934551 | -0.877036 |   |
| H    | -1.88822  | -0.93475  | 0.876545  |   |
| H    | 0.375003  | -1.992517 | 0.000198  |   |
| C    | 2.294464  | 0.206778  | -0.000027 |   |
| H    | -1.654709 | 1.504442  | -0.91735  |   |
| H    | -1.654025 | 1.50418   | 0.917808  |   |
| H    | 3.086495  | 0.932777  | -0.000107 |   |
| H    | 0.266522  | 1.068714  | -0.000186 |   |

Frequencies (cm-1)

|           |           |           |           |
|-----------|-----------|-----------|-----------|
| -1958.15  | 165.3451  | 365.0936  | 404.1107  |
| 461.0392  | 555.2589  | 615.4279  | 663.1371  |
| 779.3869  | 821.0829  | 875.1504  | 942.4549  |
| 975.0232  | 999.662   | 1076.3001 | 1178.3803 |
| 1202.2303 | 1276.0323 | 1302.7613 | 1408.9012 |
| 1457.1579 | 1474.0823 | 1572.9844 | 1815.9637 |
| 3064.2184 | 3115.753  | 3133.2249 | 3225.8598 |
| 3230.6291 | 3269.3153 |           |           |

Ts30

| Atom | X         | Y         | Z         | Å |
|------|-----------|-----------|-----------|---|
| C    | -0.102234 | 1.027478  | -0.026557 |   |
| C    | 1.291976  | 0.495155  | -0.002575 |   |
| C    | -1.232422 | 0.177686  | -0.022779 |   |
| C    | 1.544154  | -0.976076 | -0.014092 |   |
| H    | 0.574882  | 0.986101  | 1.032418  |   |
| H    | 2.068201  | 1.20011   | -0.26788  |   |
| H    | 0.865363  | -1.497615 | 0.665206  |   |
| H    | -0.236591 | 2.06265   | -0.314117 |   |
| C    | -2.195006 | -0.551564 | 0.000346  |   |
| H    | 2.56939   | -1.204684 | 0.277106  |   |
| H    | 1.366366  | -1.394248 | -1.01383  |   |
| H    | -3.046419 | -1.188387 | 0.015048  |   |

Frequencies (cm-1)

|            |          |          |          |
|------------|----------|----------|----------|
| -1824.3300 | 137.0000 | 167.6597 | 227.1110 |
| 348.6129   | 409.0079 | 581.9816 | 585.4461 |
| 621.2832   | 733.5973 | 805.0219 | 868.5215 |

|           |           |           |           |
|-----------|-----------|-----------|-----------|
| 980.4351  | 1038.1707 | 1103.6408 | 1192.8234 |
| 1250.2045 | 1359.4467 | 1373.9395 | 1424.4779 |
| 1480.6185 | 1495.2562 | 2183.7641 | 2233.8280 |
| 3018.3666 | 3096.4715 | 3148.3556 | 3207.6414 |
| 3226.5488 | 3494.2763 |           |           |

Ts31

| Atom | X         | Y         | Z         | Å |
|------|-----------|-----------|-----------|---|
| C    | -0.051547 | 1.048135  | -0.180842 |   |
| C    | 1.24568   | 0.413892  | 0.251485  |   |
| C    | -1.205972 | 0.158071  | -0.028607 |   |
| C    | 1.571993  | -0.975244 | -0.154733 |   |
| H    | 1.185302  | -0.618391 | 1.031548  |   |
| H    | 2.070345  | 1.066423  | 0.50716   |   |
| H    | -0.233357 | 1.960652  | 0.391871  |   |
| H    | 0.011024  | 1.34059   | -1.239737 |   |
| C    | -2.139643 | -0.585337 | 0.097904  |   |
| H    | 0.812615  | -1.570312 | -0.642541 |   |
| H    | 2.602775  | -1.297719 | -0.170679 |   |
| H    | -2.971768 | -1.238343 | 0.211134  |   |

Frequencies (cm-1)

|           |           |           |           |
|-----------|-----------|-----------|-----------|
| -1834.44  | 117.5952  | 172.198   | 345.6222  |
| 354.8015  | 371.7035  | 582.1305  | 691.4562  |
| 705.2767  | 719.7314  | 739.079   | 879.2799  |
| 932.8758  | 950.7333  | 1078.007  | 1175.4185 |
| 1254.8112 | 1260.7986 | 1344.7429 | 1367.19   |
| 1435.8697 | 1467.6747 | 2248.8738 | 2254.9086 |
| 2997.4538 | 3100.2105 | 3182.6047 | 3214.7074 |
| 3303.2086 | 3495.5943 |           |           |

Ts32

| Atom | X         | Y         | Z         | Å |
|------|-----------|-----------|-----------|---|
| C    | 0.059709  | 1.083161  | 0.07247   |   |
| C    | -1.285268 | 0.420659  | -0.080812 |   |
| C    | 1.197293  | 0.168434  | 0.011053  |   |
| C    | -1.490756 | -0.89734  | -0.183266 |   |
| H    | -2.489472 | -1.291853 | -0.323079 |   |
| H    | -2.133044 | 1.098798  | -0.054984 |   |
| H    | 0.175422  | 1.851003  | -0.700198 |   |
| H    | 0.08583   | 1.616903  | 1.029888  |   |
| C    | 2.12678   | -0.588508 | -0.038422 |   |
| H    | -0.65945  | -1.588034 | -0.270297 |   |
| H    | -1.581544 | -1.551144 | 1.71209   |   |
| H    | 2.955711  | -1.254103 | -0.079557 |   |

Frequencies (cm-1)

|          |         |          |          |
|----------|---------|----------|----------|
| -644.230 | 112.228 | 168.205  | 226.639  |
| 344.452  | 366.371 | 400.021  | 616.888  |
| 643.126  | 712.003 | 726.987  | 884.200  |
| 954.607  | 973.580 | 1000.266 | 1025.348 |

|          |          |          |          |
|----------|----------|----------|----------|
| 1095.213 | 1237.877 | 1318.774 | 1357.290 |
| 1435.563 | 1462.318 | 1676.052 | 2259.808 |
| 3047.353 | 3076.084 | 3168.853 | 3184.898 |
| 3263.656 | 3495.145 |          |          |

## References

1. Y. Hidaka, T. Nishimori, K. Sato, Y. Henmi, R. Okuda, K. Inami and T. Higashihara, *Combust. Flame*, 1999, **117**, 755-776.
